# Supplementary material for: Alkyl coupling in tertiary amines as analog of Guerbet condensation reaction
Source: Royal Society of Chemistry journal article supplement (doi:10.1039/c8ra08316a), 2019-01-01
Supplement: c8ra08316a1.pdf [file c8ra08316a1.pdf]

## Supporting information

### Alkyl coupling in tertiary amines as analog of Guerbet condensation reaction

Yage Zhou<sup>1,2</sup>, Dan Wu<sup>2</sup>, Willinton Yesid Hernández<sup>2</sup>, Changru Ma<sup>2</sup>, Huangyang Su<sup>1,2</sup>, Vitaly Ordonsky<sup>2\*</sup>

<sup>1</sup>State Key Laboratory of Chemical Engineering, School of Chemical Engineering, East China University of Science and Technology, 130 Mei long Road, Shanghai 200237, China

<sup>2</sup>Eco-Efficient Products and Processes Laboratory (E2P2L), UMI 3464 CNRS-Solvay, 201108 Shanghai, People's Republic of China

## METHODS

Metal supported catalysts Pd/Al<sub>2</sub>O<sub>3</sub>, Pd/C, Pt/C, Ru/C, Pt/Al<sub>2</sub>O<sub>3</sub>, Rh/Al<sub>2</sub>O<sub>3</sub> containing 5 wt. % of the metal have been purchased from Johnson Matthey. Ni/Al<sub>2</sub>O<sub>3</sub> containing 5 wt.% of Ni has been prepared by impregnation of corresponding amount of Ni(NO<sub>3</sub>)·6H<sub>2</sub>O with subsequent calcination at 450 °C and reduction at 550 °C with subsequent transfer of the catalyst into reactor in inert atmosphere.

The catalytic tests have been conducted in 50 ml batch reactors. The catalysts have been loaded in the reactor (0.1 g) and reduced in the reactor before catalytic tests at 200 °C during 1 h. Afterwards, the reactor has been charged with 2 g of tertiary amine, pressurized by 5 bar of N<sub>2</sub> or H<sub>2</sub> with subsequent heating to the target temperature for 5-17 h. In some experiment 5 g of cyclohexane has been added as a solvent. The reaction products have been analyzed by GC, GC-MS and <sup>1</sup>H and <sup>13</sup>C NMR.

The TEM observations of the samples were performed on a FEI Tecnai F30 electron microscope, operating at 300 kV. CO or O<sub>2</sub> chemisorption measurements were carried out with a Micromeritics ASAP 2020 instrument to evaluate the metal dispersion. Before each measurement, the sample was reduced at 200 °C. After the reduction, the sample was cool down to 45 °C with subsequent pulse adsorption of the gas. FTIR measurements were carried out on a Nicolet Protege 380 spectrometer. About 20 mg of the sample was pressed in self-supported wafer. The sample has been activated at 200 °C under hydrogen atmosphere with subsequent vacuuming and cooled down to r.t. 10 torr of TEA has been adsorbed over the catalyst with subsequent gradually heating till 200 °C. CO adsorption has been performed by addition of 10 torr of CO at room temperature with subsequent deep vacuuming.

**Table S1.** Metal dispersion of the catalysts

| Catalysts                         | Metal content, wt. % | Adsorption properties |                                       |               |                   | Particle size, nm* |
|-----------------------------------|----------------------|-----------------------|---------------------------------------|---------------|-------------------|--------------------|
|                                   |                      | Gas adsorption        | Metal surface area, m <sup>2</sup> /g | Dispersion, % | Particle size, nm |                    |
| Pd/Al <sub>2</sub> O <sub>3</sub> | 4.5                  | CO                    | 109                                   | 24            | 5                 | 3                  |
| Pt/C                              | 4.9                  | O <sub>2</sub>        | 120                                   | 24            | 4.6               | -                  |
| Ru/Al <sub>2</sub> O <sub>3</sub> | 4.7                  | CO                    | 72                                    | 16            | 6.7               | -                  |
| Ru/C                              | 5.0                  | CO                    | 199                                   | 42            | 2.4               | 2.5                |
| Pd/C                              | 5.3                  | CO                    | 54                                    | 12            | 8.1               | -                  |
| Rh/Al <sub>2</sub> O <sub>3</sub> | 4.9                  | -                     | -                                     | -             | -                 | -                  |
| Pd black                          | 100                  | CO                    | 26                                    | 6             | 20                | -                  |
| Ni/Al <sub>2</sub> O <sub>3</sub> | 5.1                  | CO                    | 83                                    | 12            | 8.1               | -                  |

\*- analysis by TEM

**Table S2.** TEA transformation (2 g TEA,  $p(N_2)=5$  bar, 0.1 g catalyst, 5h, 200 °C )

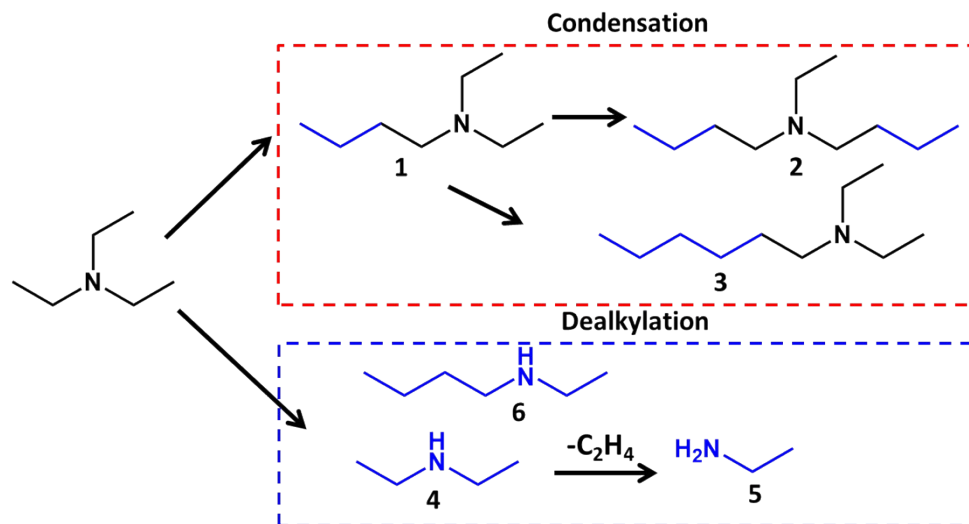

| Catalysts                                      | Conversion, % | Selectivity to amines, mol. % |    |    |                      |              |    |    |                  |
|------------------------------------------------|---------------|-------------------------------|----|----|----------------------|--------------|----|----|------------------|
|                                                |               | Coupling                      |    |    |                      | Dealkylation |    |    |                  |
|                                                |               | 1S                            | 2S | 3S | Ethyl group accepted | 4S           | 5S | 6S | Ethyl group lost |
| -                                              | 1             | -                             | -  | -  |                      | -            | -  | -  |                  |
| Pd/C                                           | 89            | 20                            | 13 | 3  | <b>52</b>            | 26           | 11 | 17 | <b>48</b>        |
| Pt/C                                           | 62            | 27                            | 5  | 3  | <b>43</b>            | 44           | 12 | 8  | <b>68</b>        |
| Pd/Al <sub>2</sub> O <sub>3</sub>              | 47            | 41                            | 5  | 1  | <b>53</b>            | 42           | 9  | 2  | <b>60</b>        |
| Pd/Al <sub>2</sub> O <sub>3</sub> <sup>a</sup> | 27            | 39                            | 2  | -  | <b>43</b>            | 42           | 11 | -  | <b>64</b>        |
| Ru/Al <sub>2</sub> O <sub>3</sub>              | 3             | 48                            | -  | -  | <b>48</b>            | 49           | -  | -  | <b>49</b>        |
| Ru/C                                           | 13            | 38                            | 1  | 4  | <b>48</b>            | 55           | 2  | 2  | <b>59</b>        |
| Rh/Al <sub>2</sub> O <sub>3</sub>              | 2             | -                             | -  | -  | <b>0</b>             | -            | -  | -  | <b>0</b>         |
| Pd/Al <sub>2</sub> O <sub>3</sub> <sup>b</sup> | 4             | 43                            | -  | -  | <b>43</b>            | 53           | -  | 2  | <b>53</b>        |
| Pd/Al <sub>2</sub> O <sub>3</sub> <sup>c</sup> | 88            | 14                            | 7  | 4  | <b>36</b>            | 30           | 26 | 11 | <b>82</b>        |

<sup>[a]</sup> H<sub>2</sub> gas phase, <sup>[b]</sup> 150 °C, <sup>[c]</sup> 250 °C

**Table S3.** TPA transformation (2 g TPA,  $p(N_2)=5$  bar, 0.1 g catalyst, 5h)

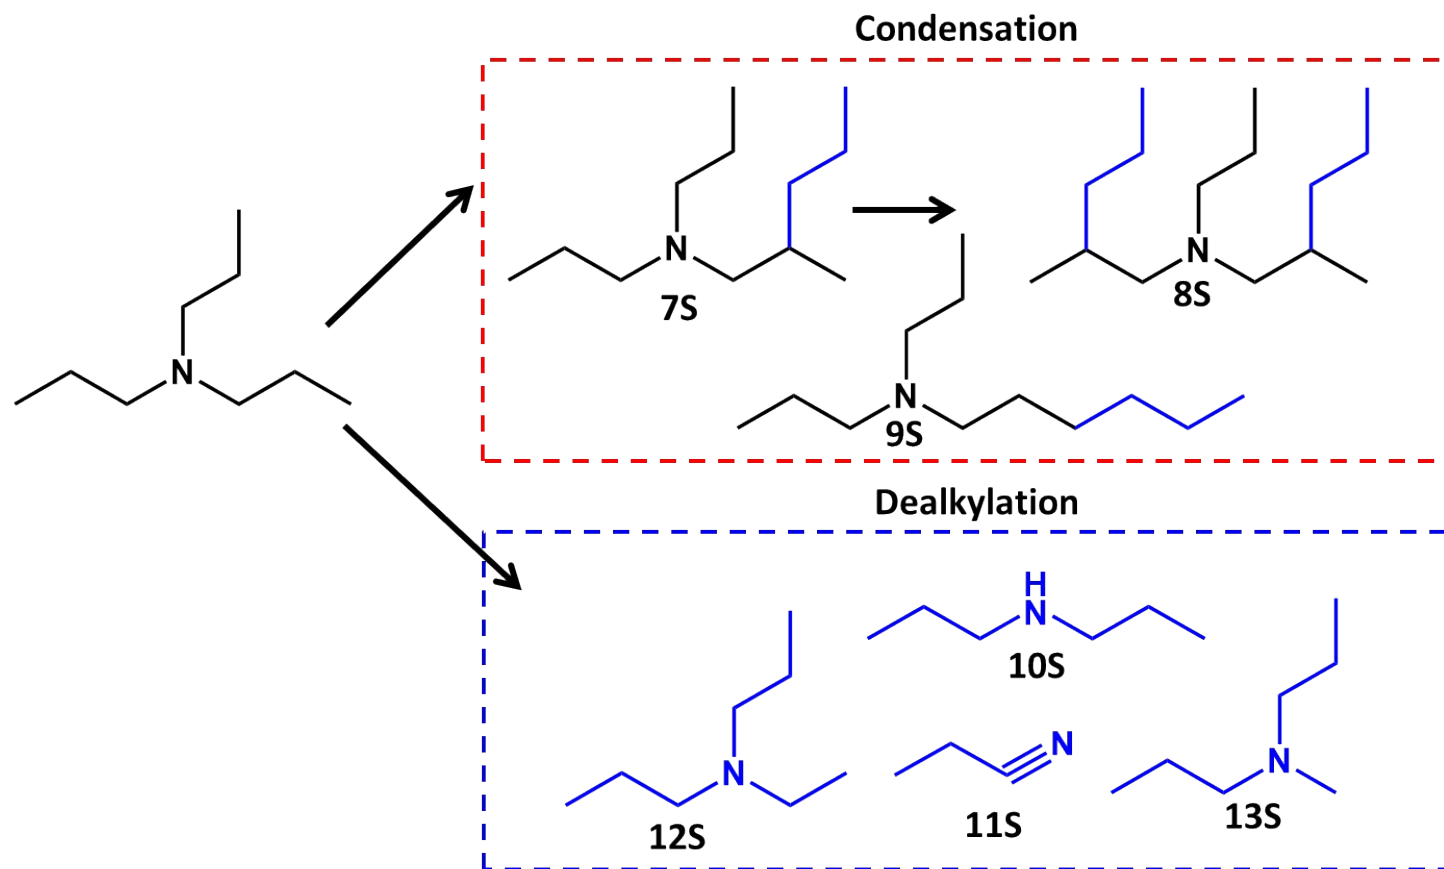

| Catalysts                         | Temperature, °C | Conversion, % | Selectivity to amines, mol. % |    |    |                       |              |     |     |     |                   |
|-----------------------------------|-----------------|---------------|-------------------------------|----|----|-----------------------|--------------|-----|-----|-----|-------------------|
|                                   |                 |               | Coupling                      |    |    |                       | Dealkylation |     |     |     |                   |
|                                   |                 |               | 7S                            | 8S | 9S | Propyl group accepted | 10S          | 11S | 12S | 13S | Propyl group lost |
| Pd/Al <sub>2</sub> O <sub>3</sub> | 200             | 9             | 44                            | -  | -  | <b>44</b>             | 54           | -   | -   | -   | <b>54</b>         |
| Pd/Al <sub>2</sub> O <sub>3</sub> | 250             | 69            | 29                            | 1  | 1  | <b>32</b>             | 63           | 5   | 1   | 1   | <b>78</b>         |

**Table S4.** *N*-ethylpiperidine transformation (2 g *N*-ethylpiperidine,  $p(N_2)=5$  bar, 0.1 g catalyst, 5h)

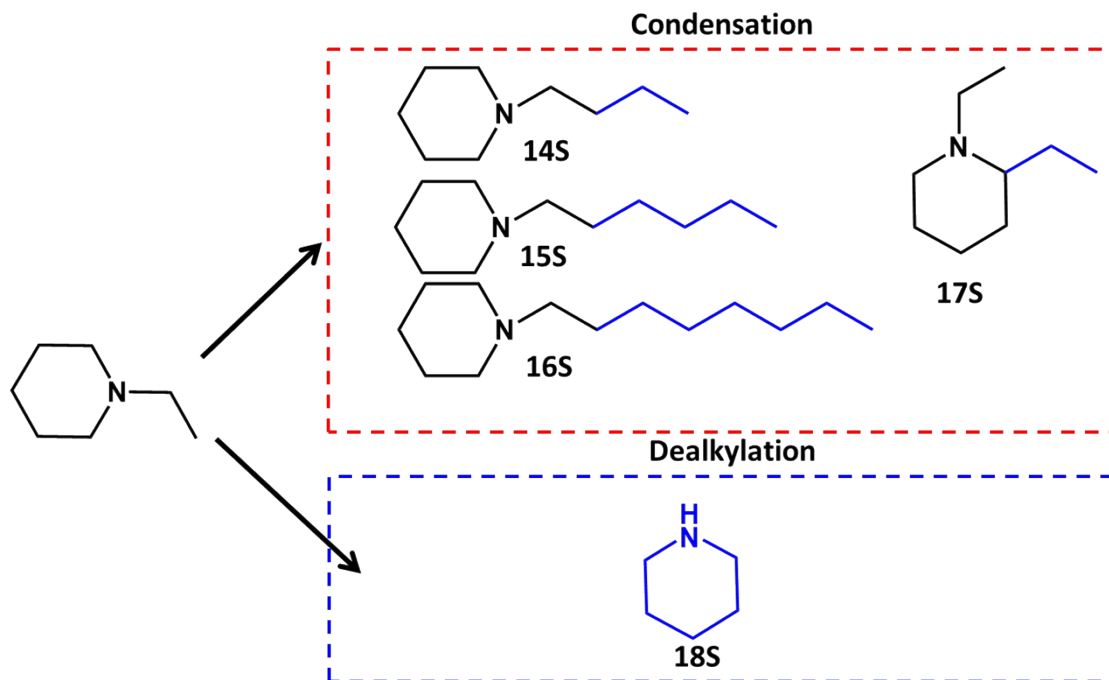

| Catalysts                         | Temperature, °C | Conversion, % | Selectivity to amines, mol. % |     |     |     |                      |              |                  |
|-----------------------------------|-----------------|---------------|-------------------------------|-----|-----|-----|----------------------|--------------|------------------|
|                                   |                 |               | Coupling                      |     |     |     |                      | Dealkylation |                  |
|                                   |                 |               | 14S                           | 15S | 16S | 17S | Ethyl group accepted | 18S          | Ethyl group lost |
| Pd/Al <sub>2</sub> O <sub>3</sub> | 200             | 36            | 21                            | 6   | 4   | 2   | <b>45</b>            | 58           | <b>58</b>        |

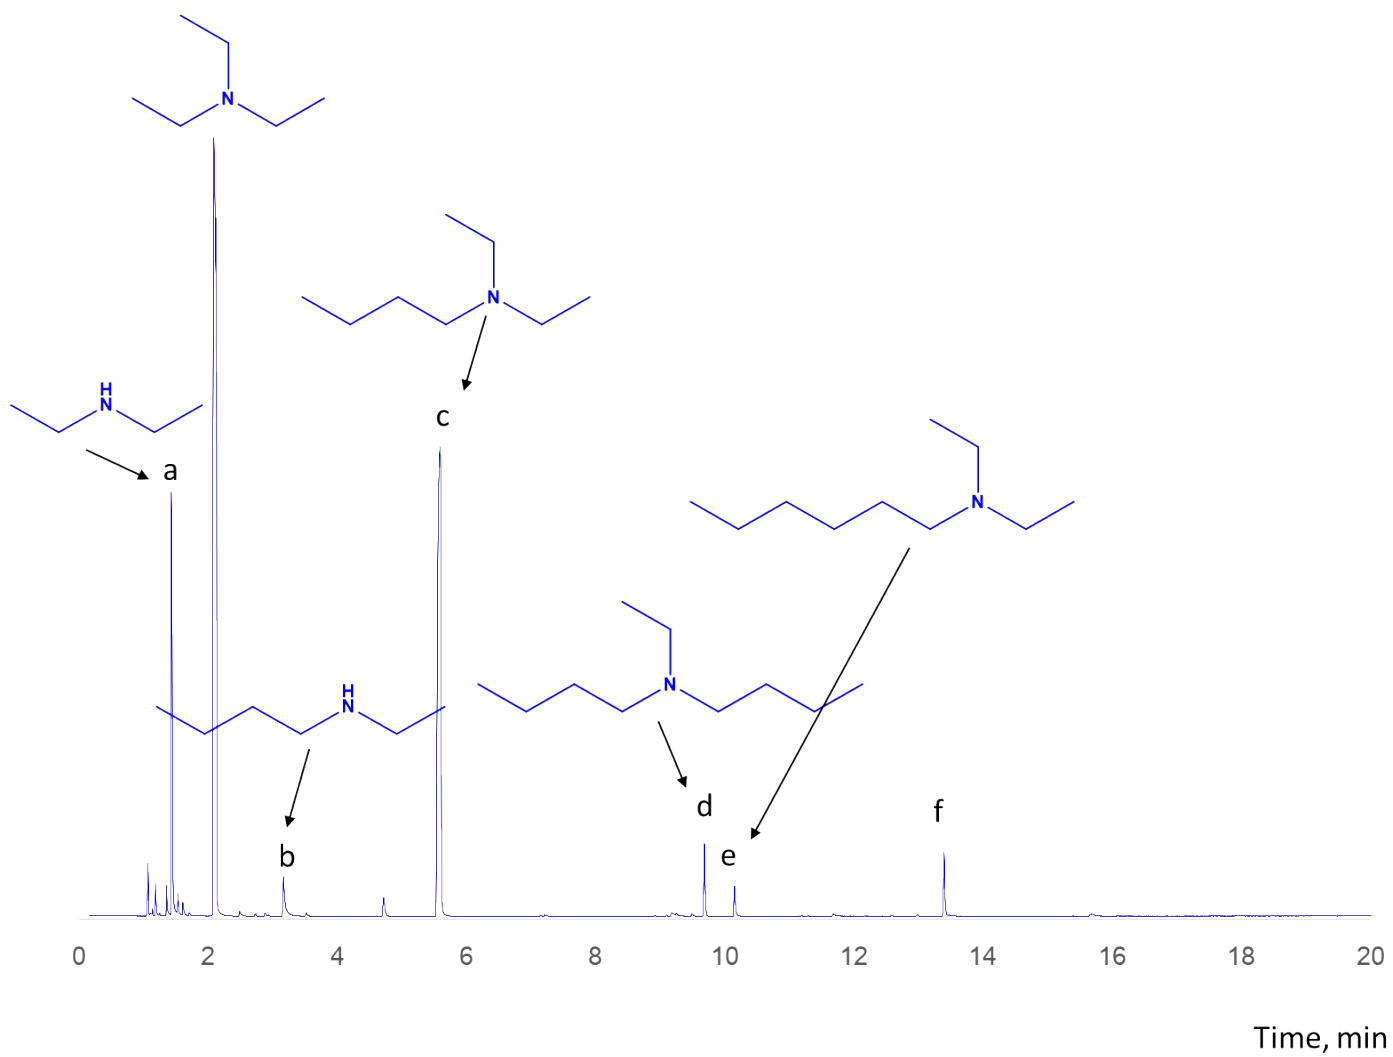

**Figure S1.** GC-MS analysis after 5h during TEA transformation (2 g TEA,  $p(N_2)=5$  bar, 0.1 g Pd/Al<sub>2</sub>O<sub>3</sub>, 200 °C) with assignment of the products a,b,c,d,e,f in the Figure S2

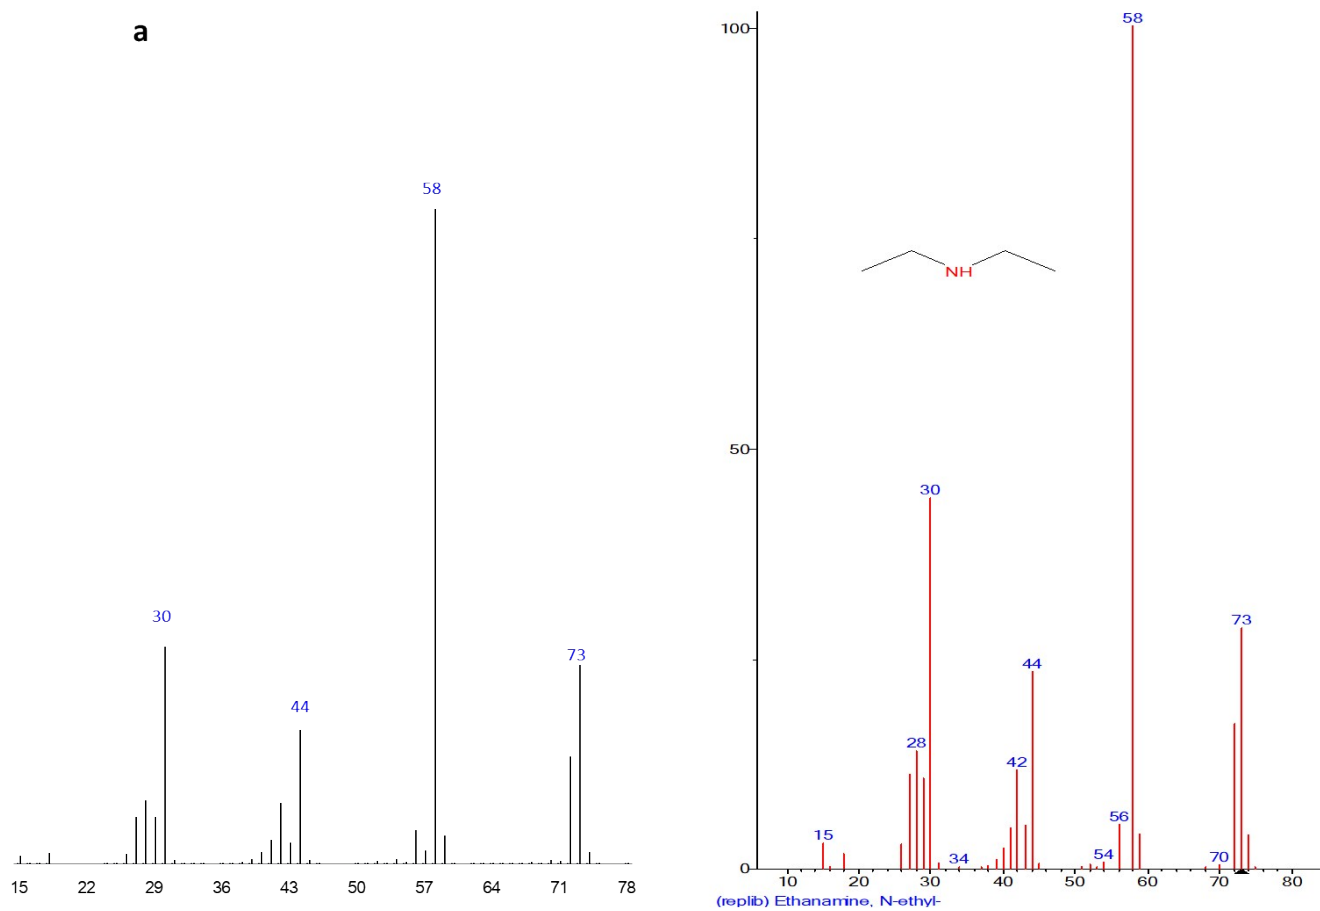

**Figure S2-a.** MS spectrum of the product **a** from Figure S1 in comparison with assignment in NIST library to diethylamine



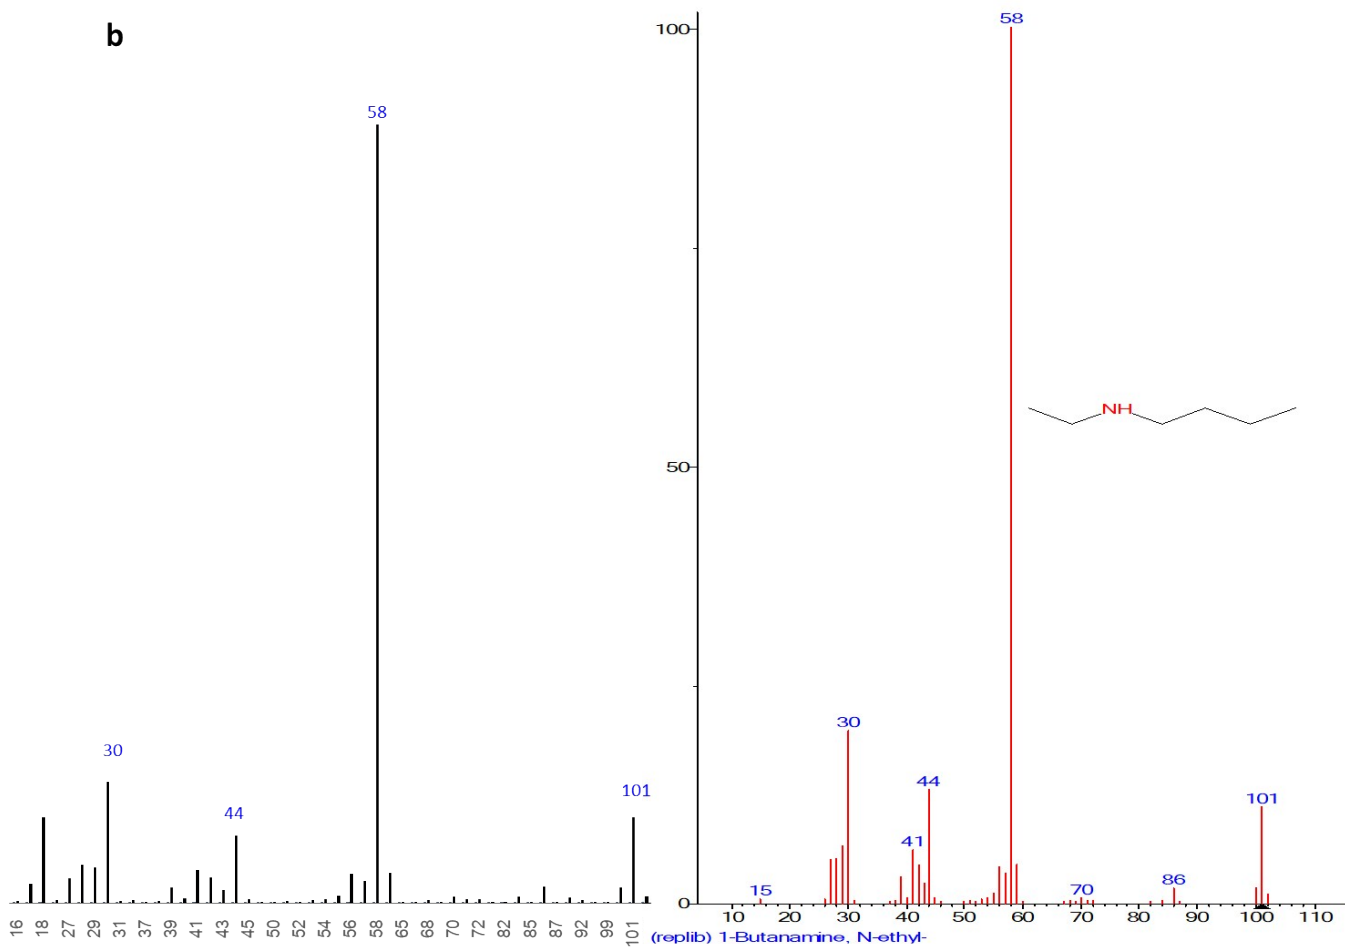

**Figure S2-b.** MS spectrum of the product *b* from Figure S1 in comparison with assignment in NIST library to butylethylamine

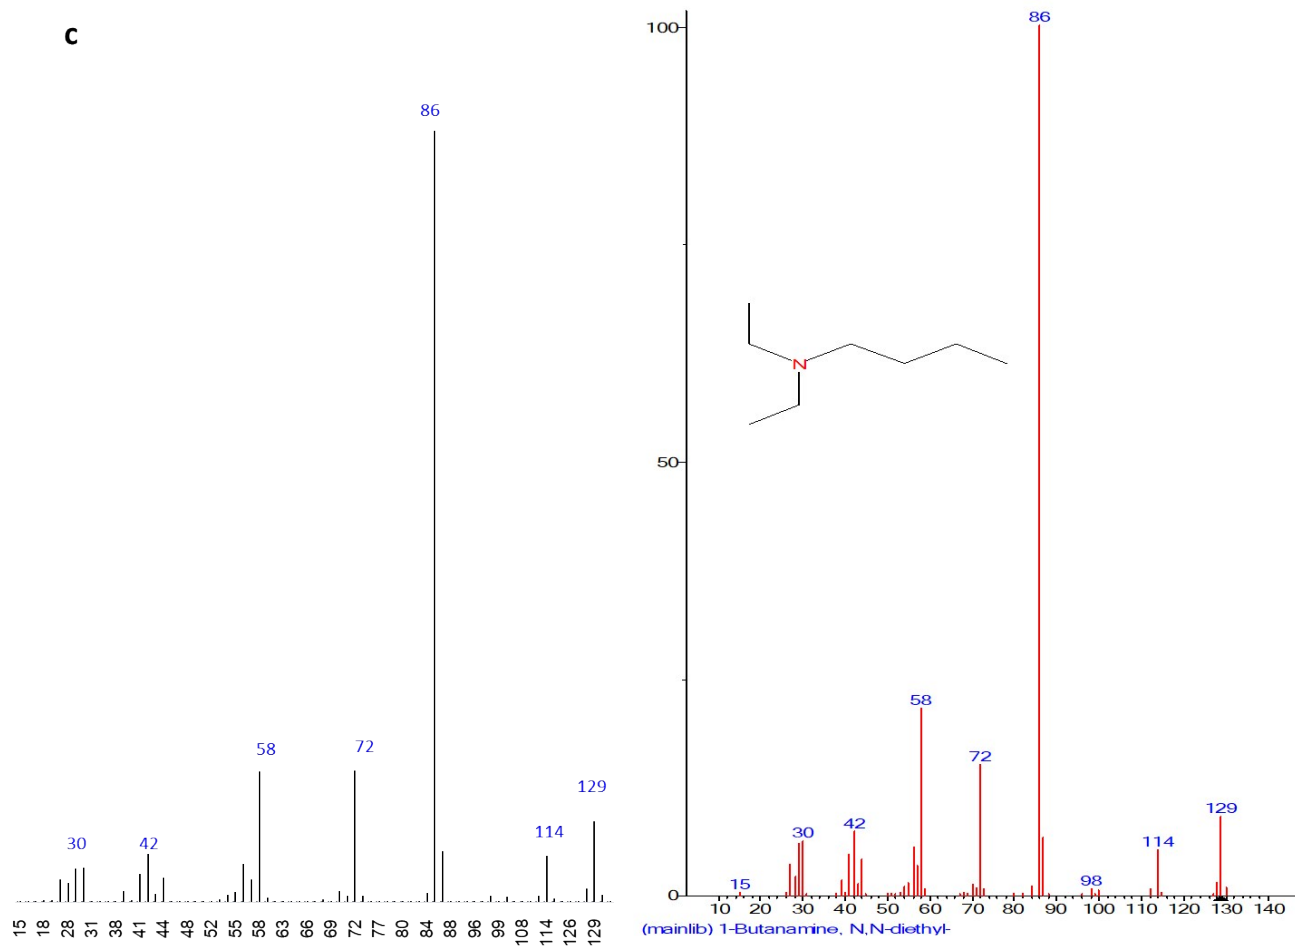

**Figure S2-c.** MS spectrum of the product **c** from Figure S1 in comparison with assignment in NIST library to butyldiethylamine

d

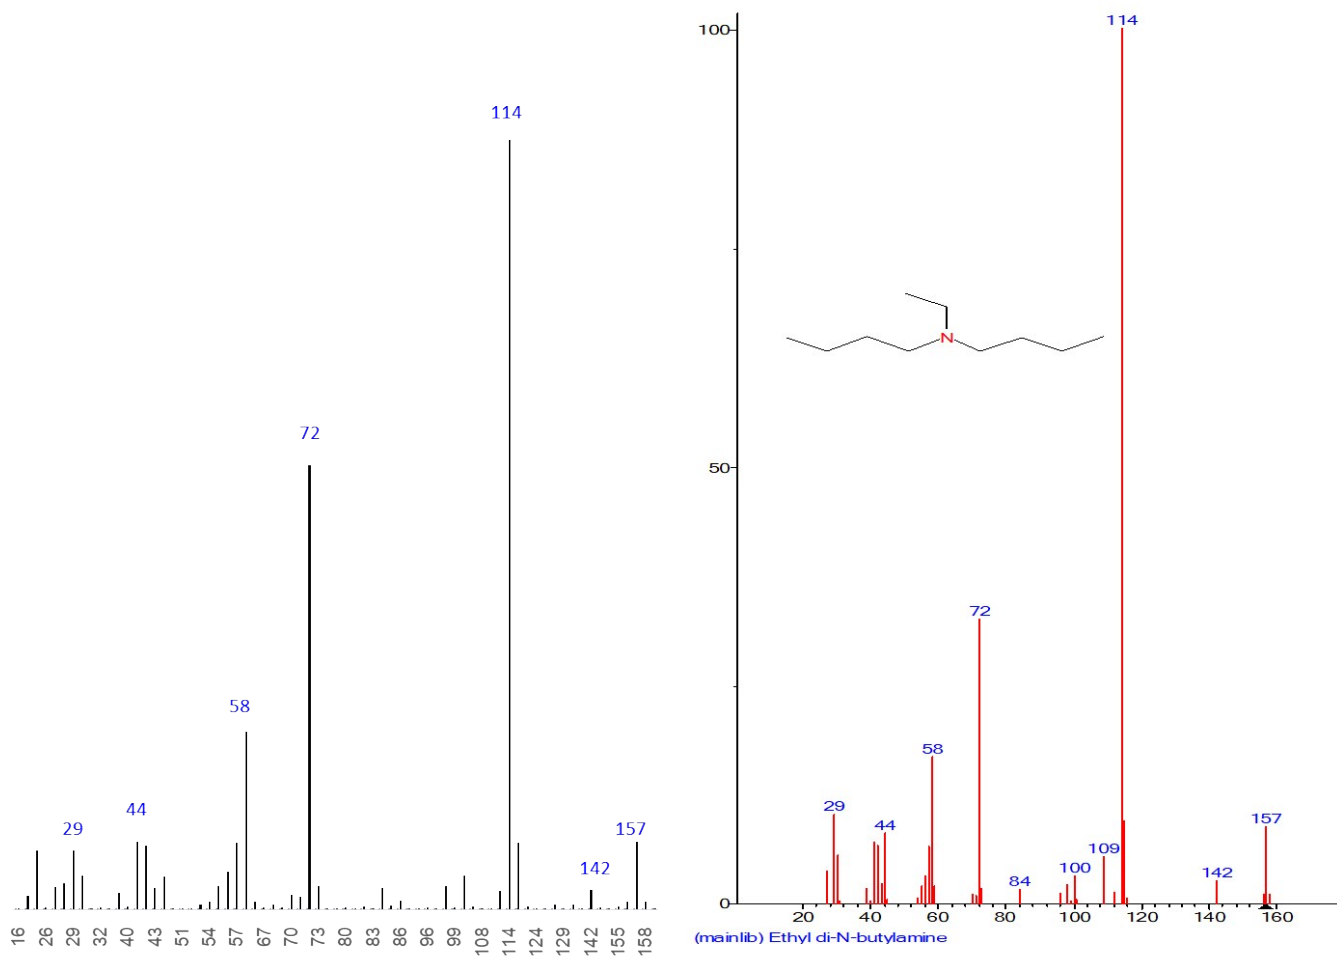

**Figure S2-d.** MS spectrum of the product d from Figure S1 in comparison with assignment in NIST library to dibutylethylamine

e

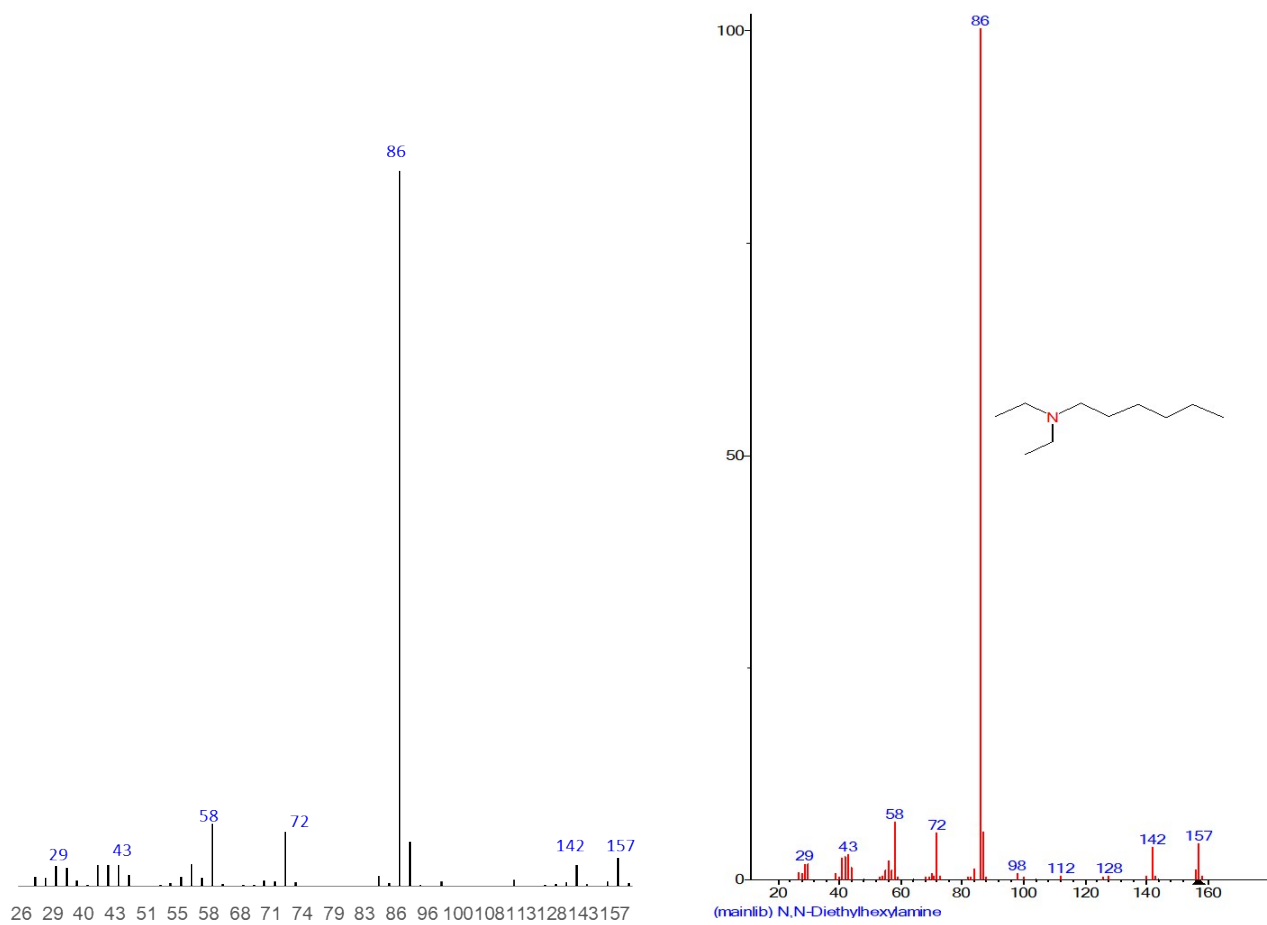

**Figure S2-e.** MS spectrum of the product e from Figure S1 in comparison with assignment in NIST library to hexyldiethylamine

f

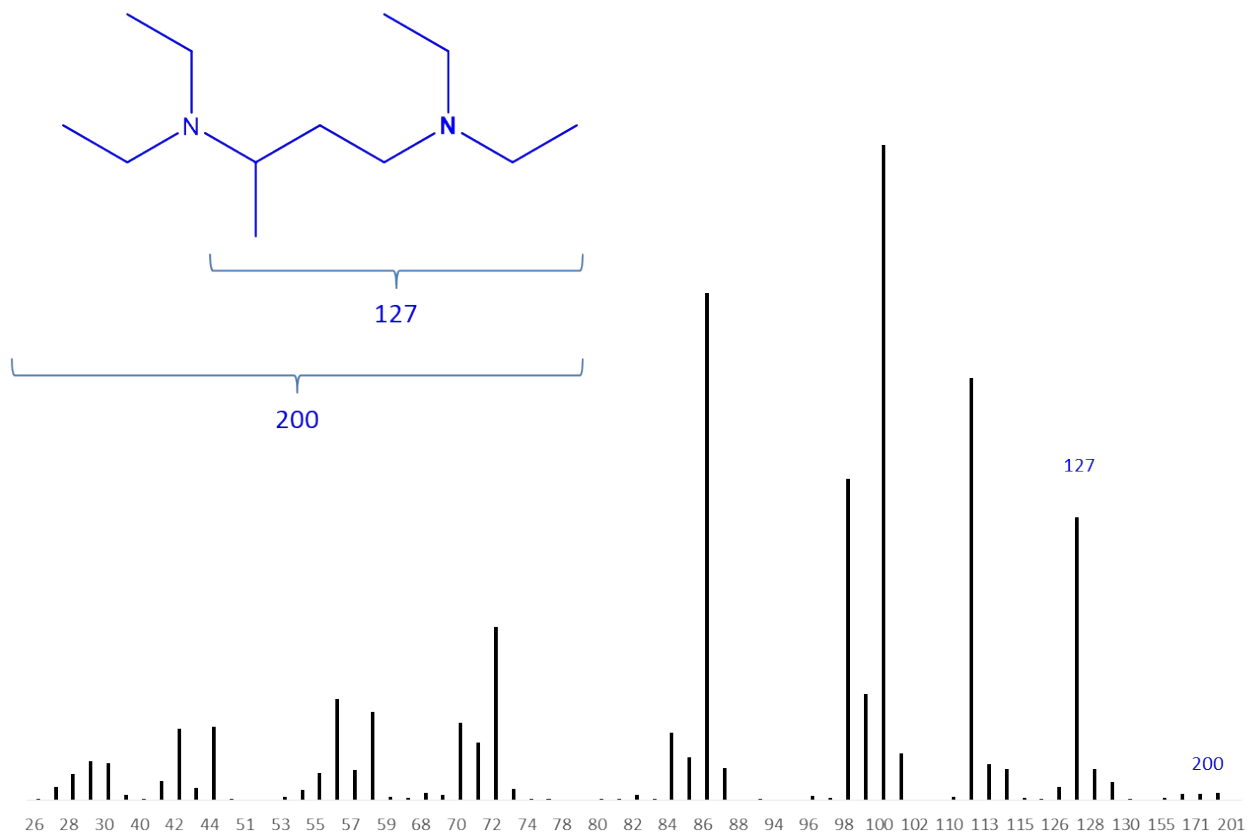

**Figure S2-f.** MS spectrum of the product f from Figure S1 indicating on formation of intermediate diamine product

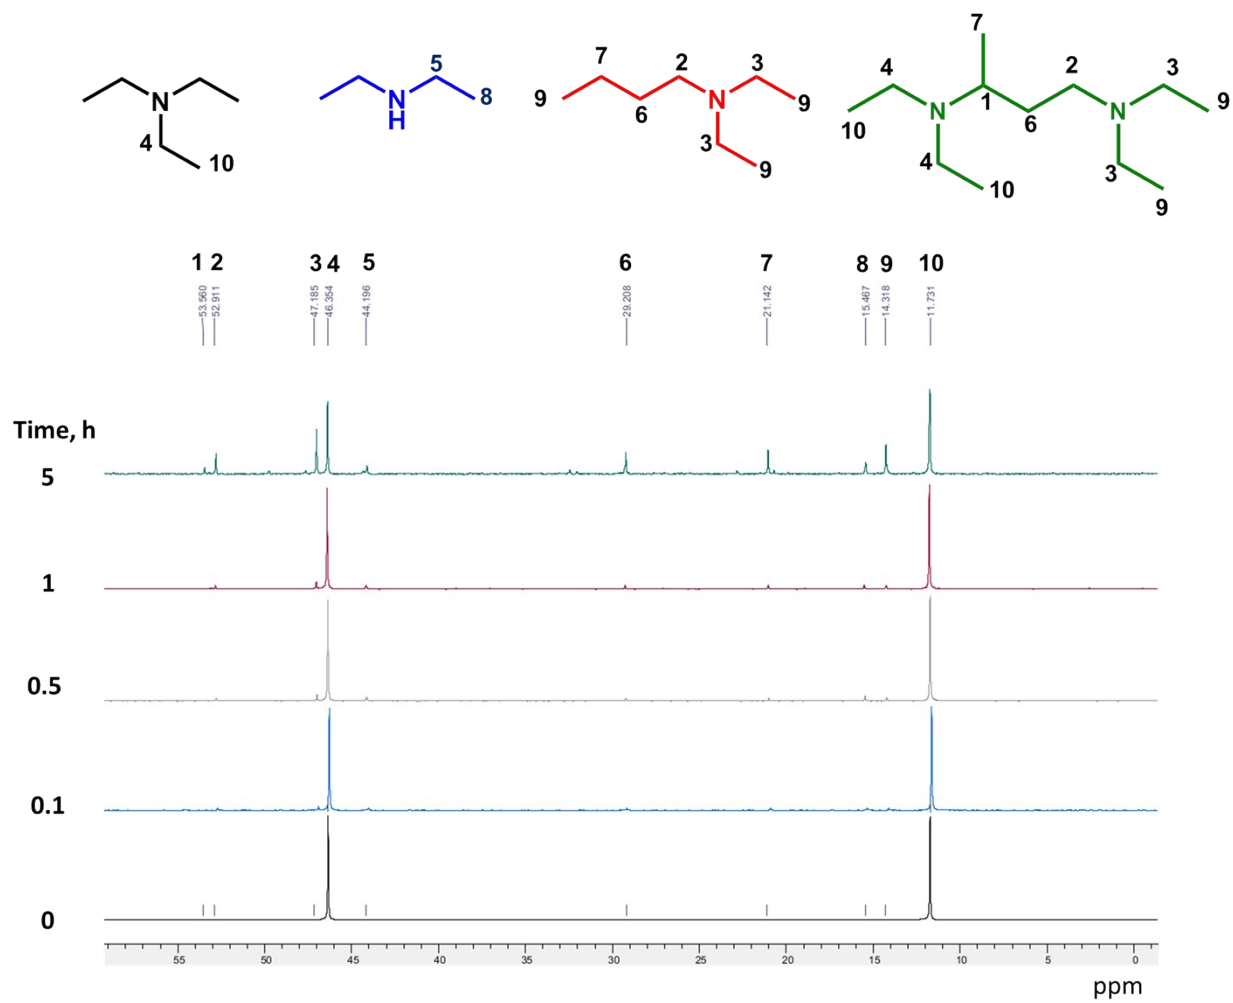

**Figure S3.** <sup>13</sup>C NMR analysis after different reaction time during TEA transformation (2 g TEA,  $p(N_2)=5$  bar, 0.1 g Pd/Al<sub>2</sub>O<sub>3</sub>, 200 °C )

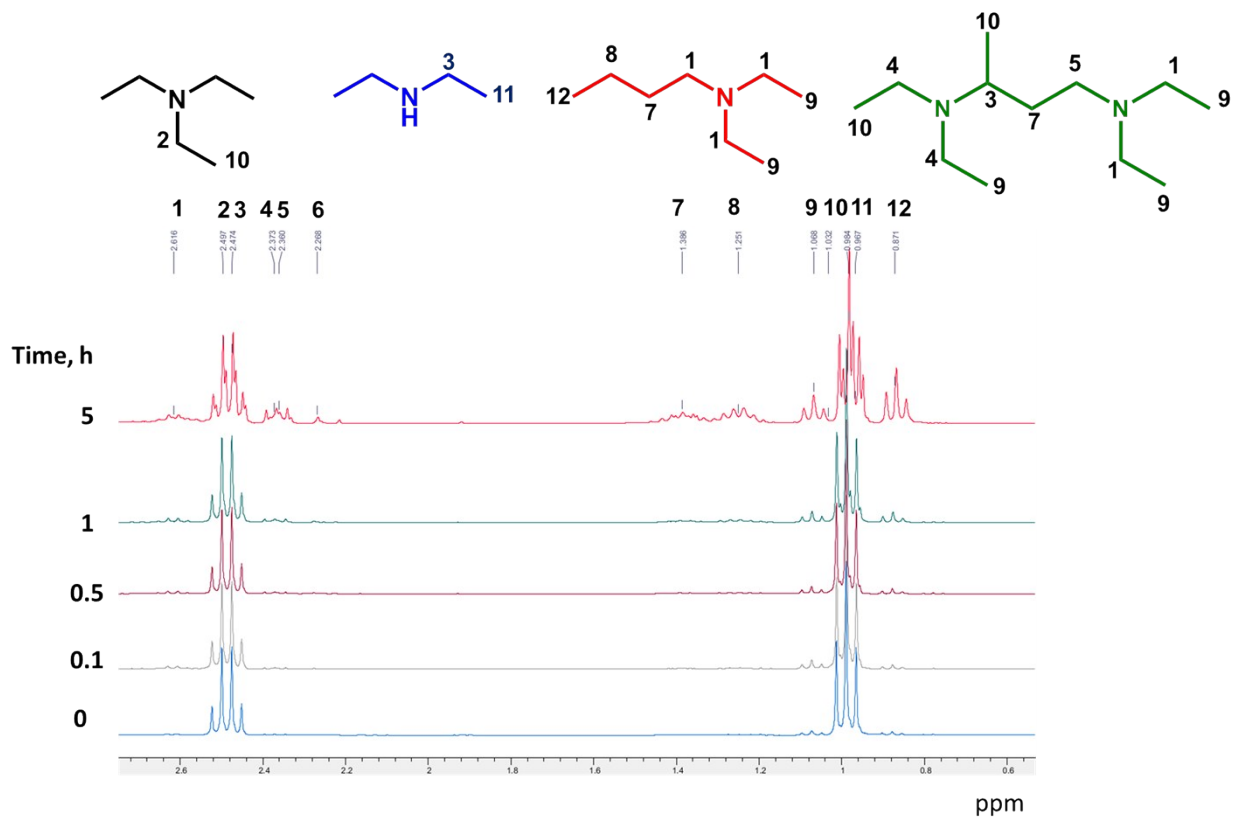

**Figure S4.**  $^1\text{H}$  NMR analysis after different reaction time during TEA transformation (2 g TEA,  $p(\text{N}_2)=5$  bar, 0.1 g  $\text{Pd}/\text{Al}_2\text{O}_3$ , 200 °C )

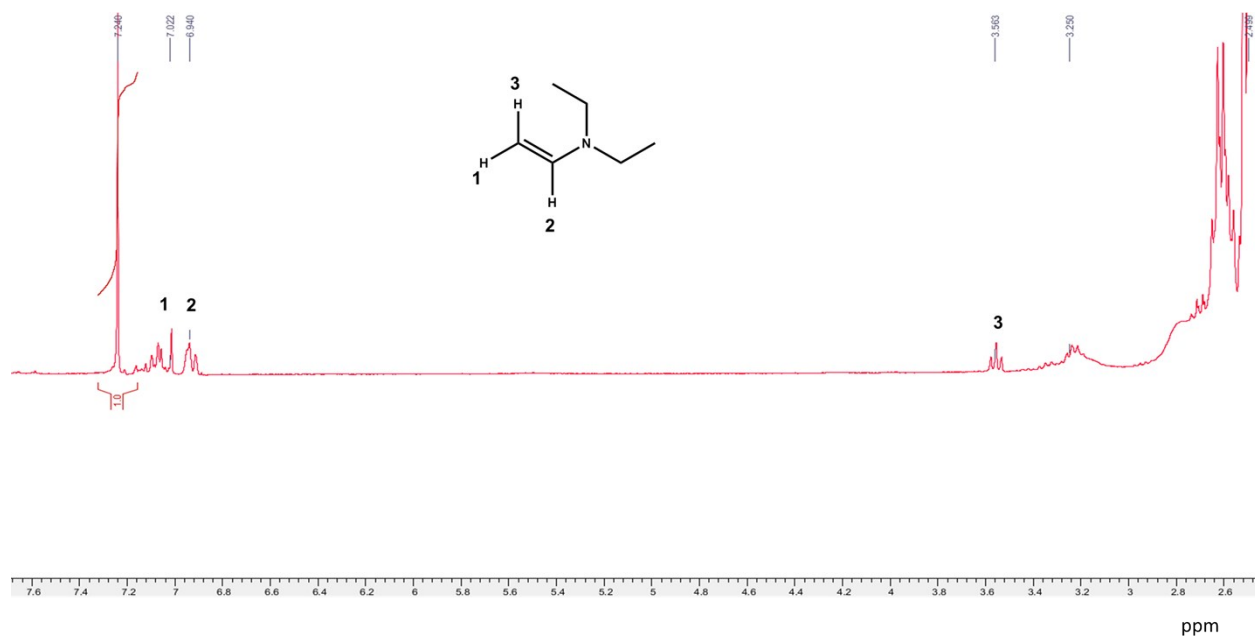

**Figure S5.** <sup>1</sup>H NMR analysis after 5h during TEA transformation (2 g TEA, p(N<sub>2</sub>)=5 bar, 0.1 g Pd/Al<sub>2</sub>O<sub>3</sub>, 200 °C)



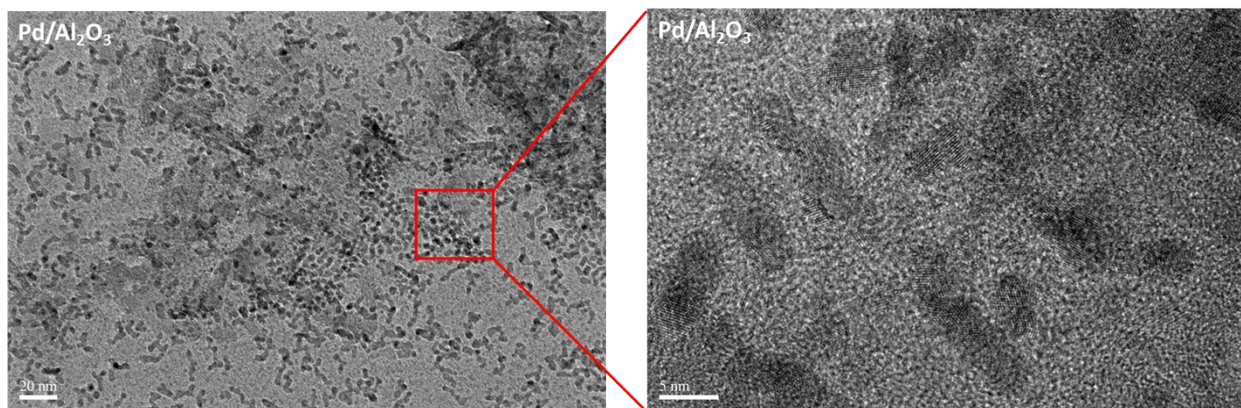

**Figure S6.** TEM images of Pd/Al<sub>2</sub>O<sub>3</sub>

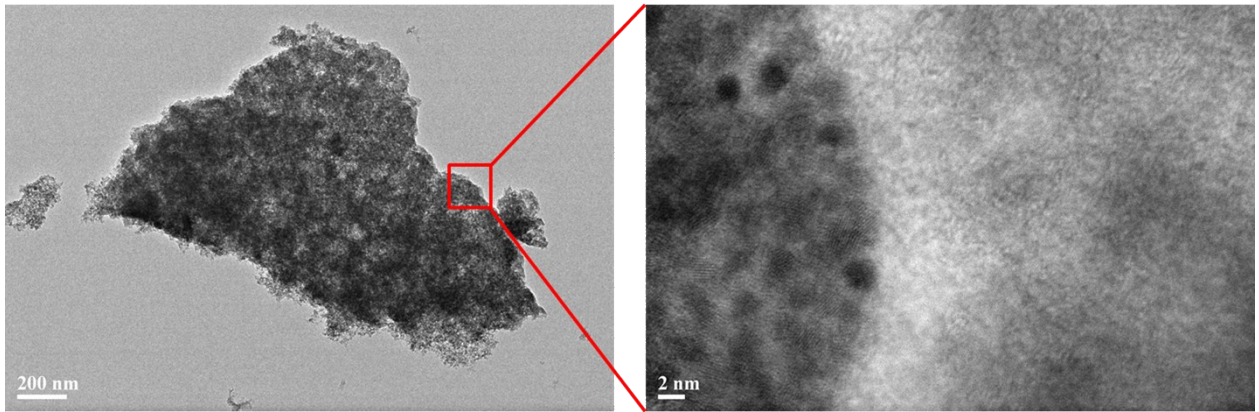

*Figure S7. TEM images of Ru/C*

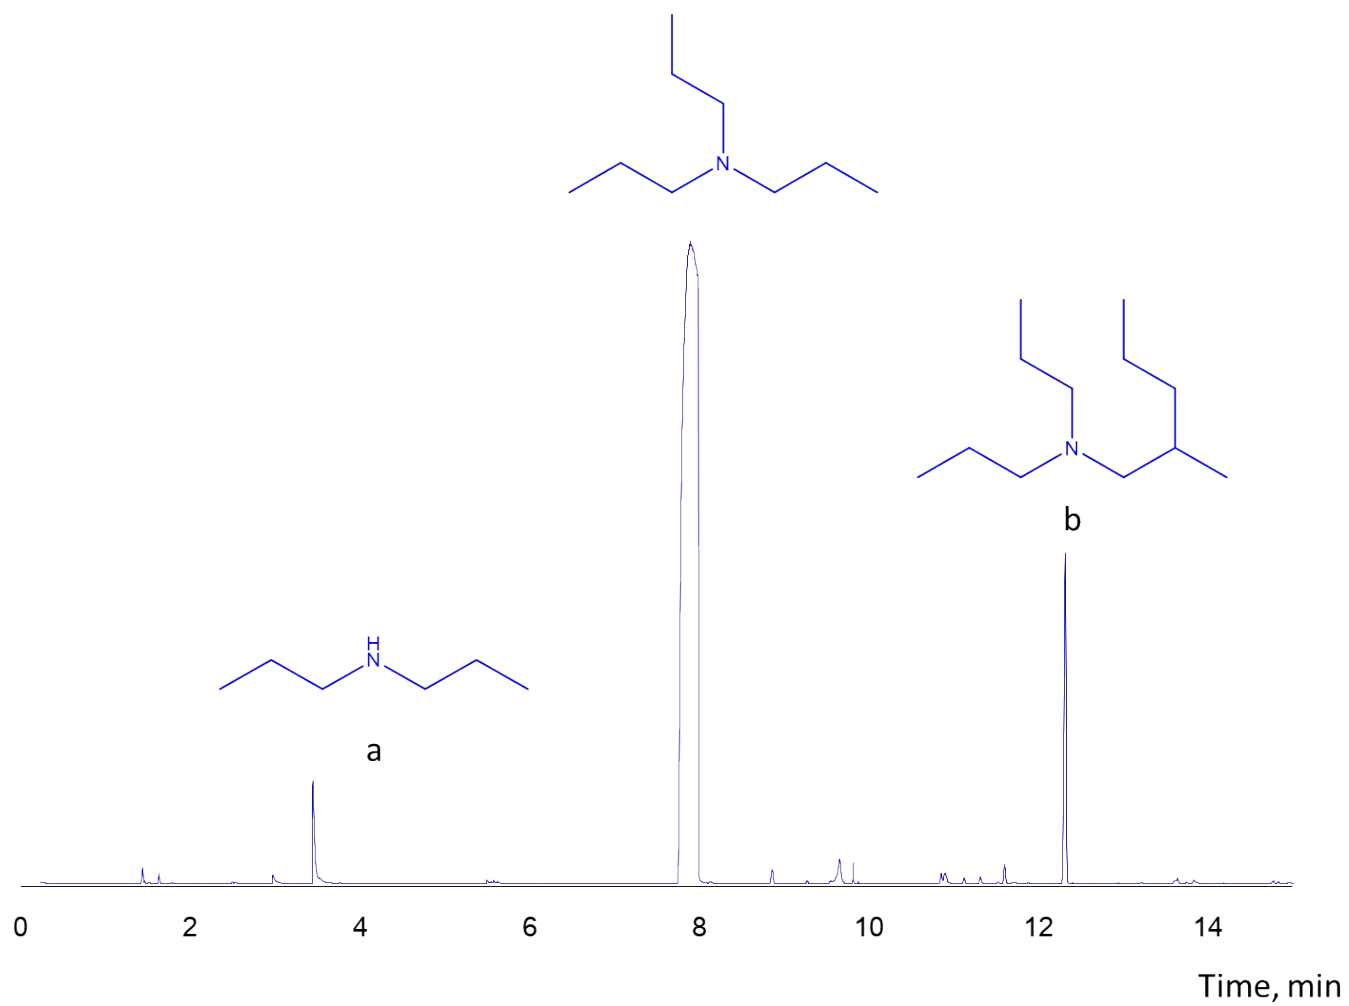

**Figure S8.** GC-MS analysis after 5h during TPA transformation (2 g TPA,  $p(N_2)=5$  bar, 0.1 g Pd/Al<sub>2</sub>O<sub>3</sub>, 200 °C ) with assignment of the products a,b in the Figure S9

**a**

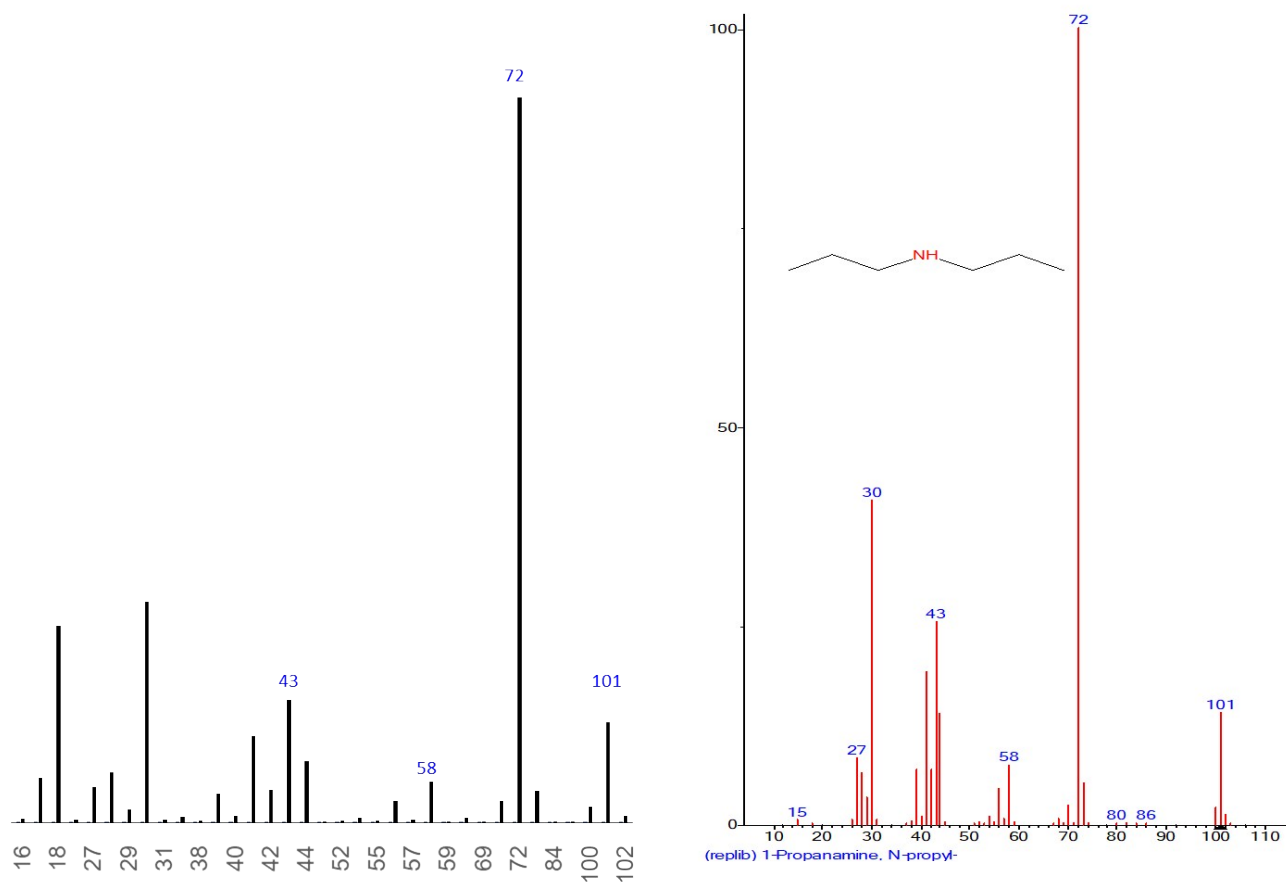

**Figure S9-a.** MS spectrum of the product a from Figure S8 in comparison with assignment in NIST library to dipropylamine

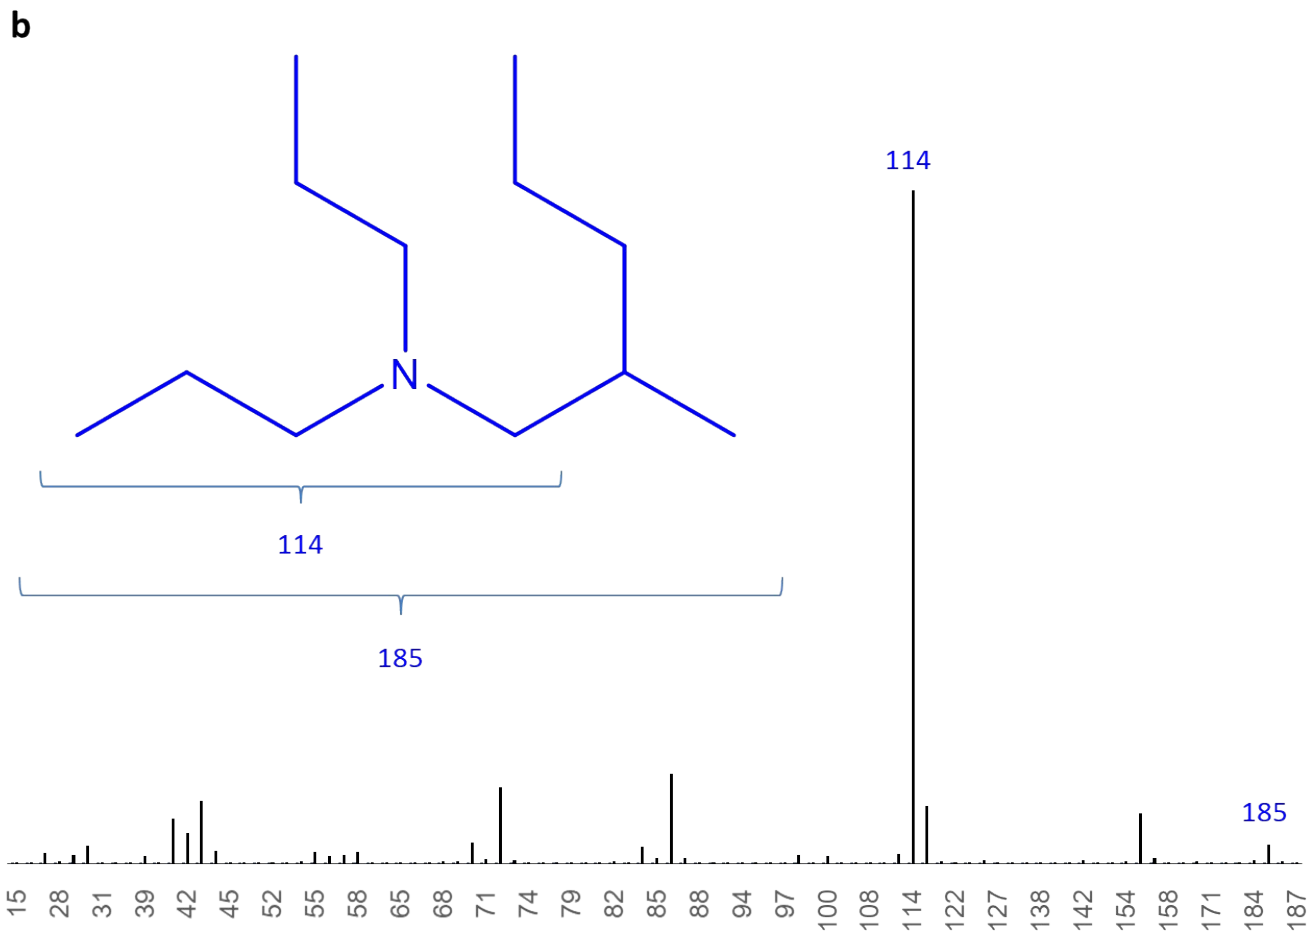

**Figure S9-b.** MS spectrum of the product *b* from Figure S8 indicating on formation of 2-methy-*N,N*-dipropylpentane-1-amine

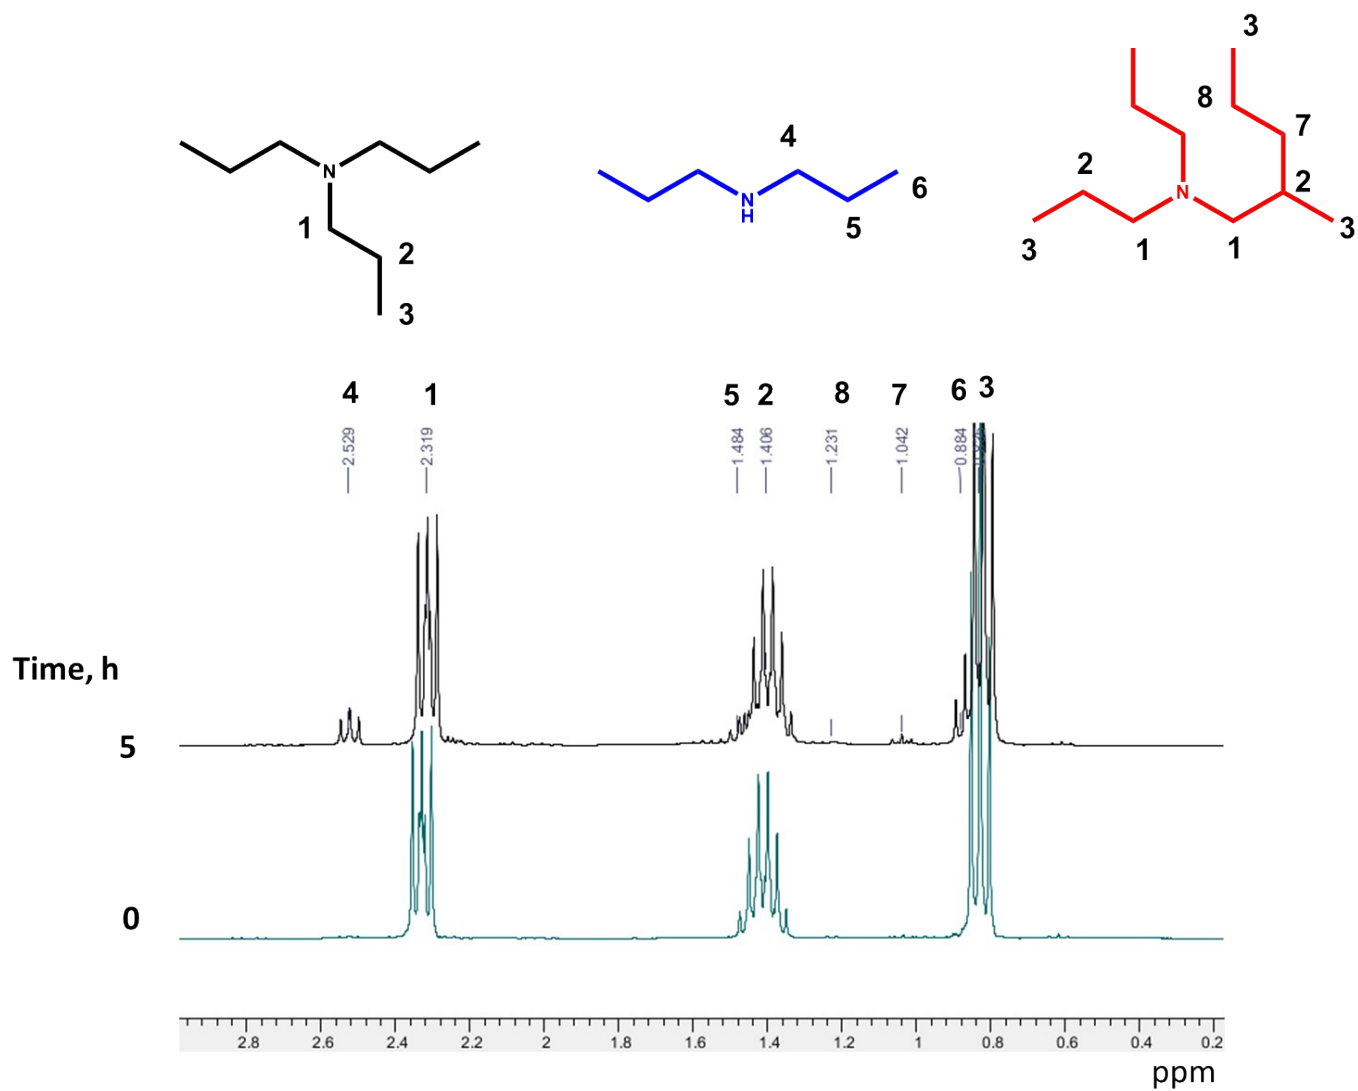

**Figure S10.** <sup>1</sup>H NMR analysis after 5 h during TPA transformation (2 g TPA,  $p(N_2)$ =5 bar, 0.1 g Pd/Al<sub>2</sub>O<sub>3</sub>, 200 °C )

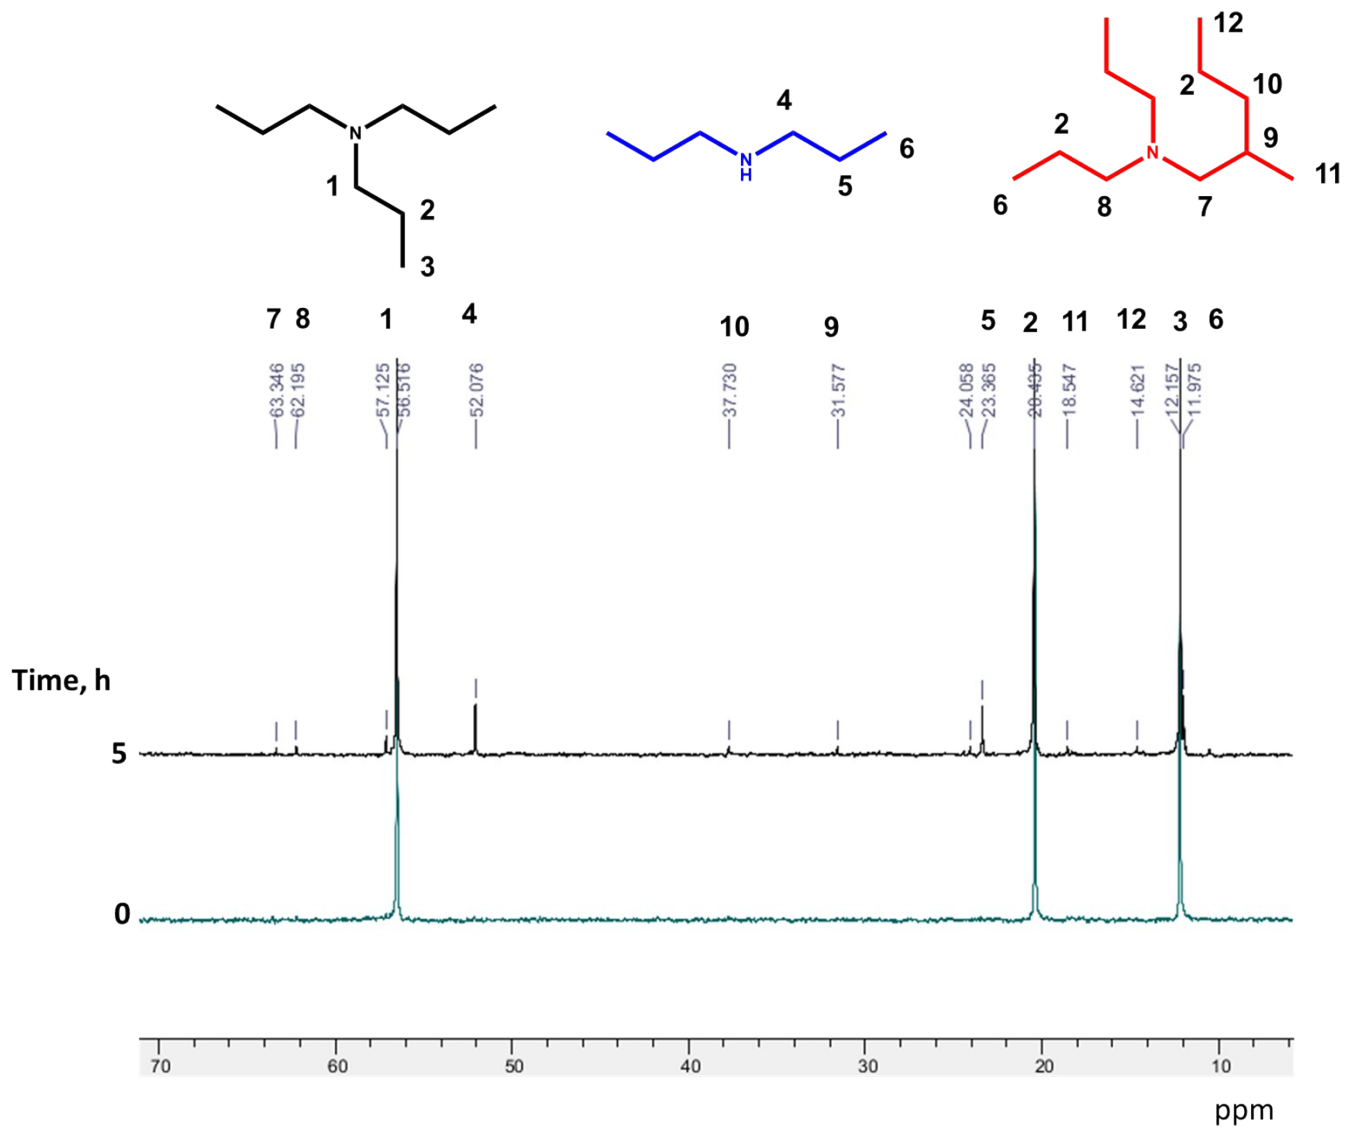

**Figure S11.**  $^{13}\text{C}$  NMR analysis after 5 h during TPA transformation (2 g TPA,  $p(\text{N}_2)=5$  bar, 0.1 g  $\text{Pd}/\text{Al}_2\text{O}_3$ , 200 °C )

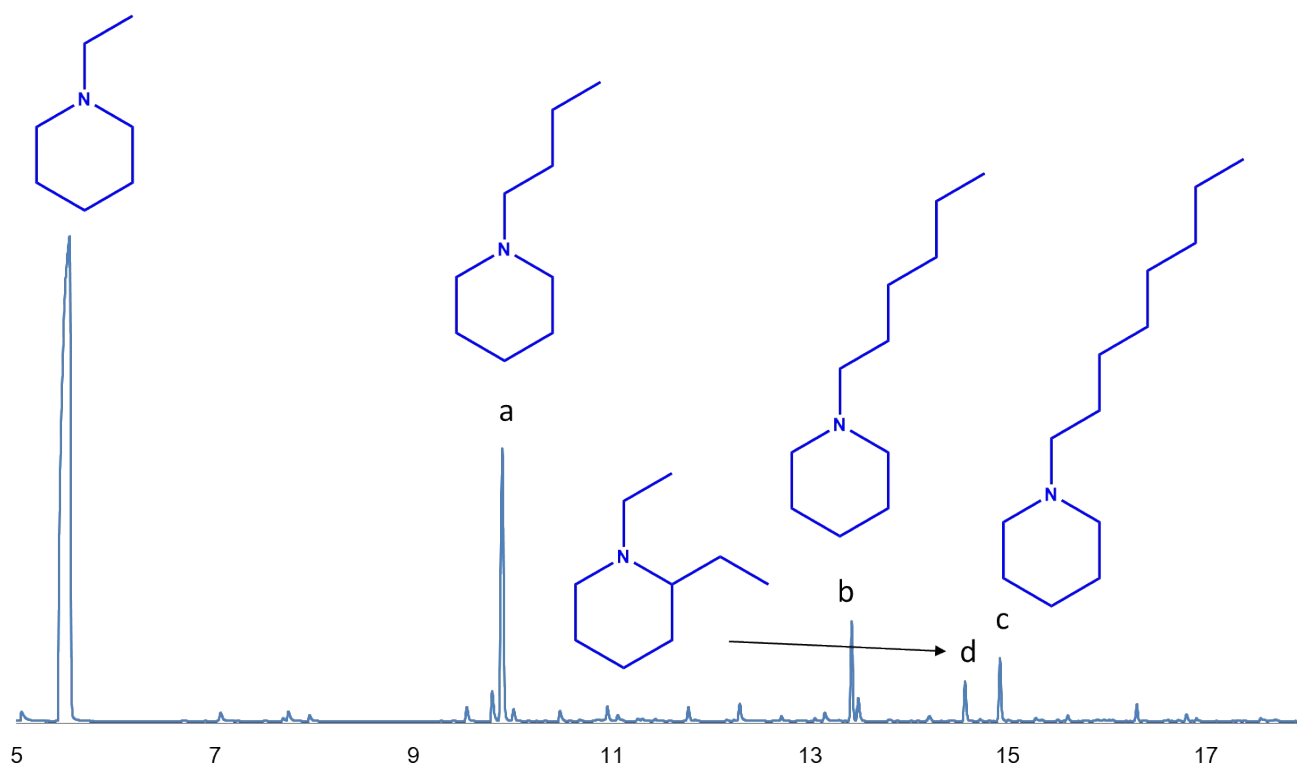

**Figure S12.** GC-MS analysis after 5h during N-ethylpiperidine transformation (2 g N-ethylpiperidine,  $p(N_2)=5$  bar, 0.1 g Pd/Al<sub>2</sub>O<sub>3</sub>, 200 °C) with assignment of the products a,b,c in the Figure S13



a

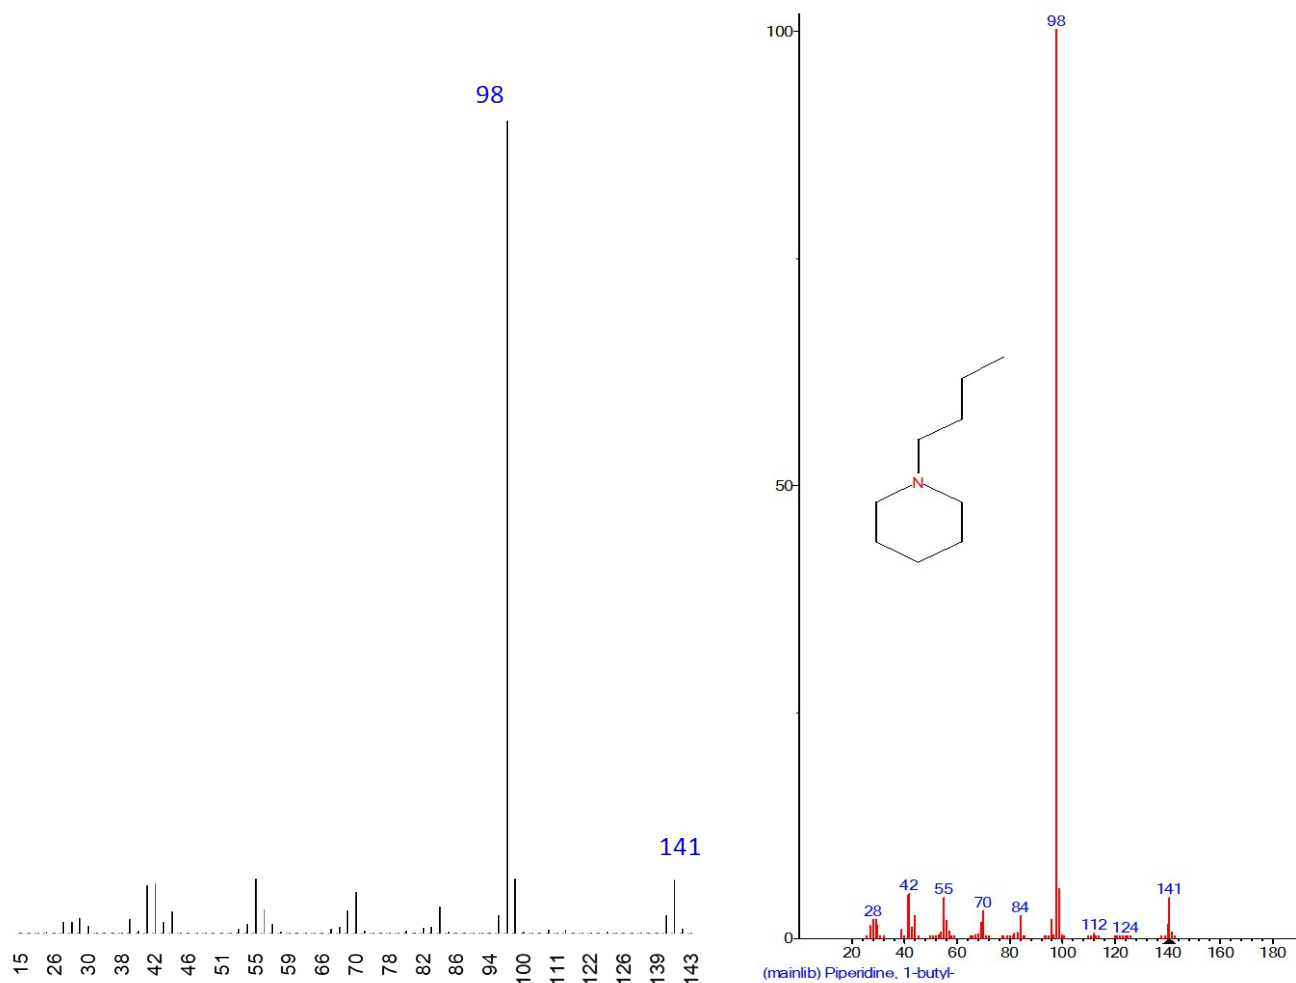

**Figure S13-a.** MS spectrum of the product a from Figure S12 in comparison with assignment in NIST library to N-butylpiperidine

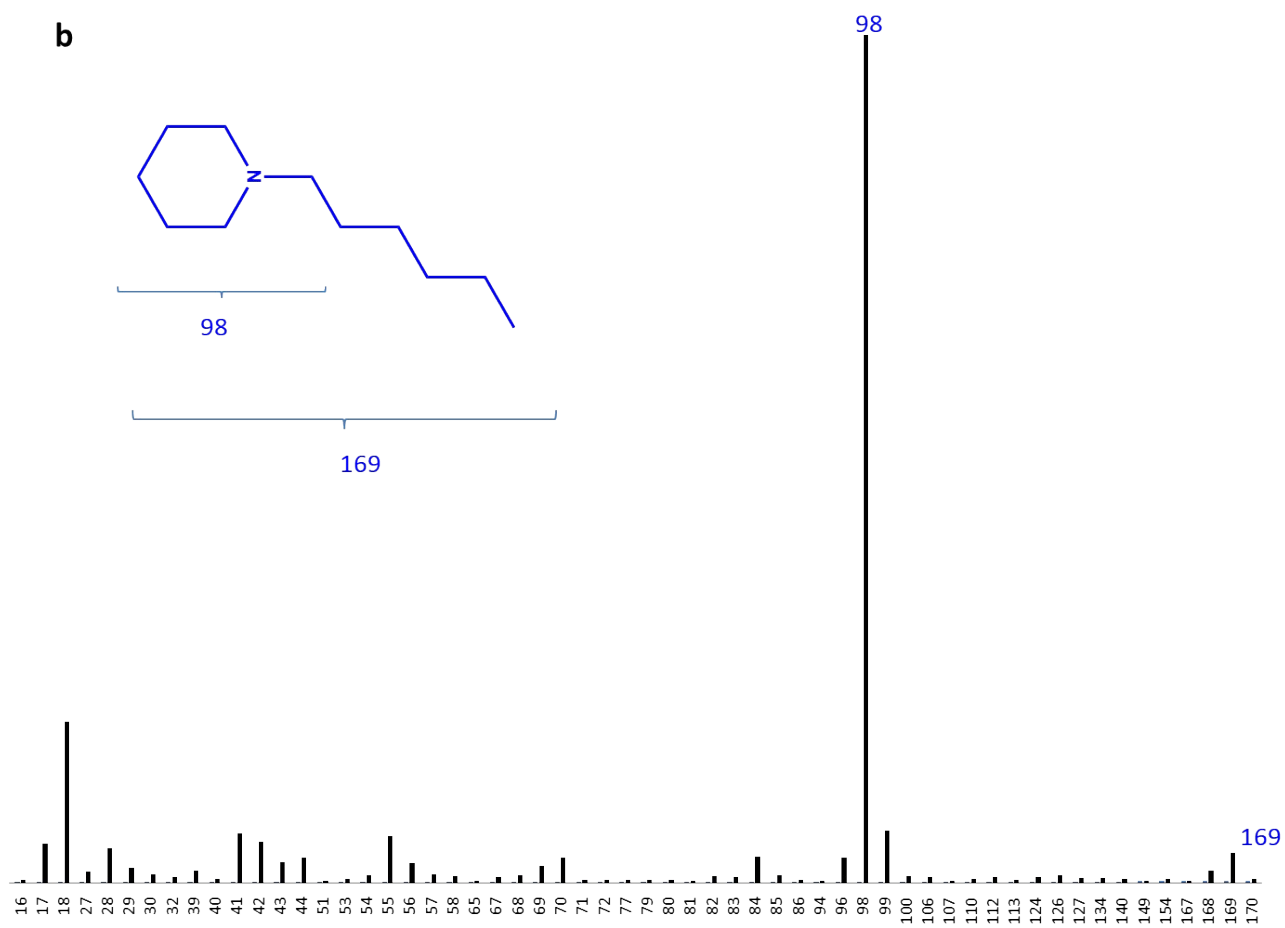

**Figure S13-b.** MS spectrum of the product **b** from Figure S12 indicating on formation of *N*-hexylpiperidine

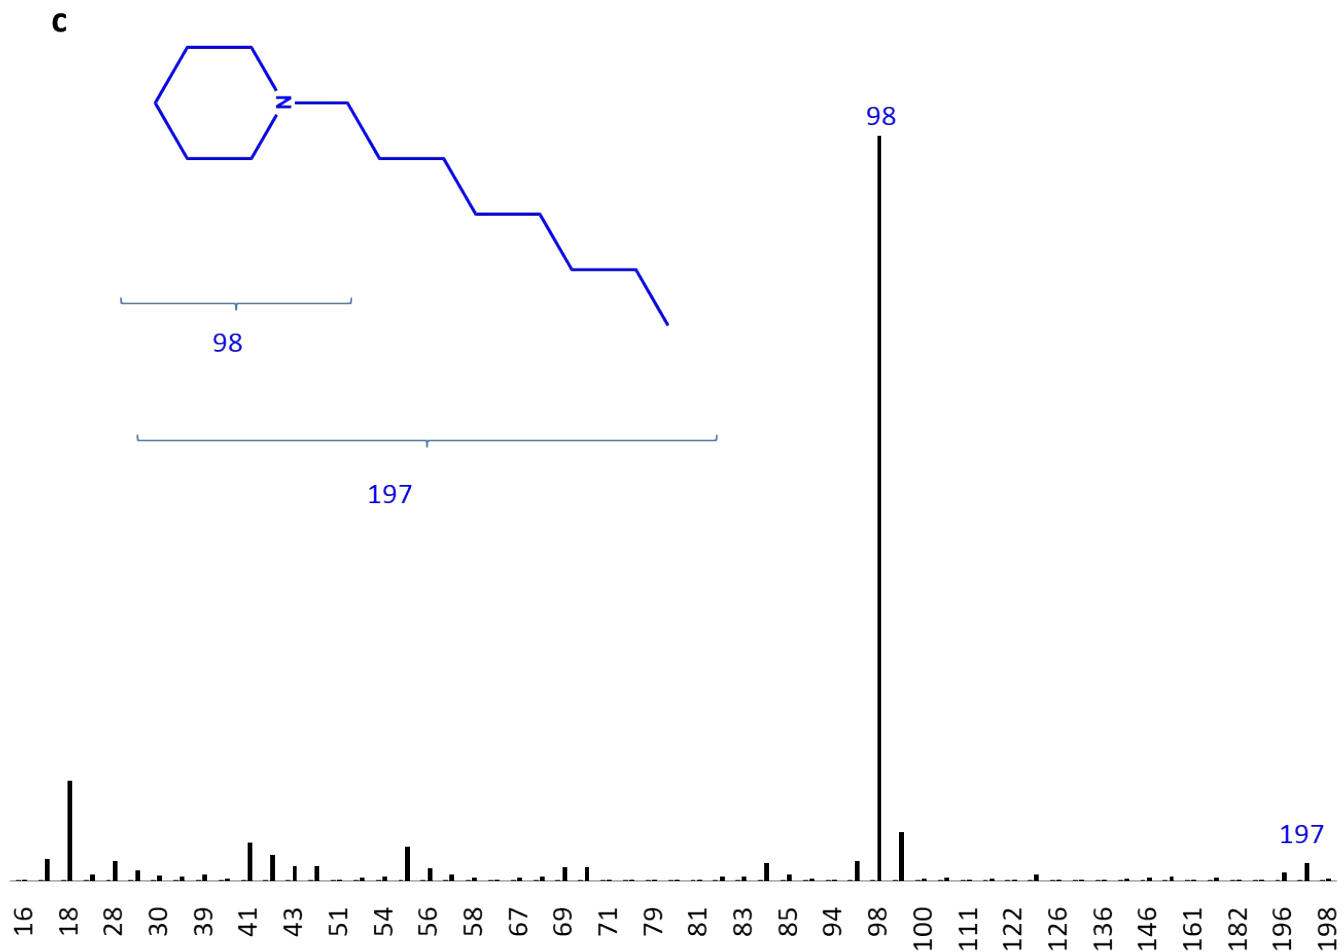

**Figure S13-c.** MS spectrum of the product b from Figure S12 indicating on formation of N-octylpiperidine

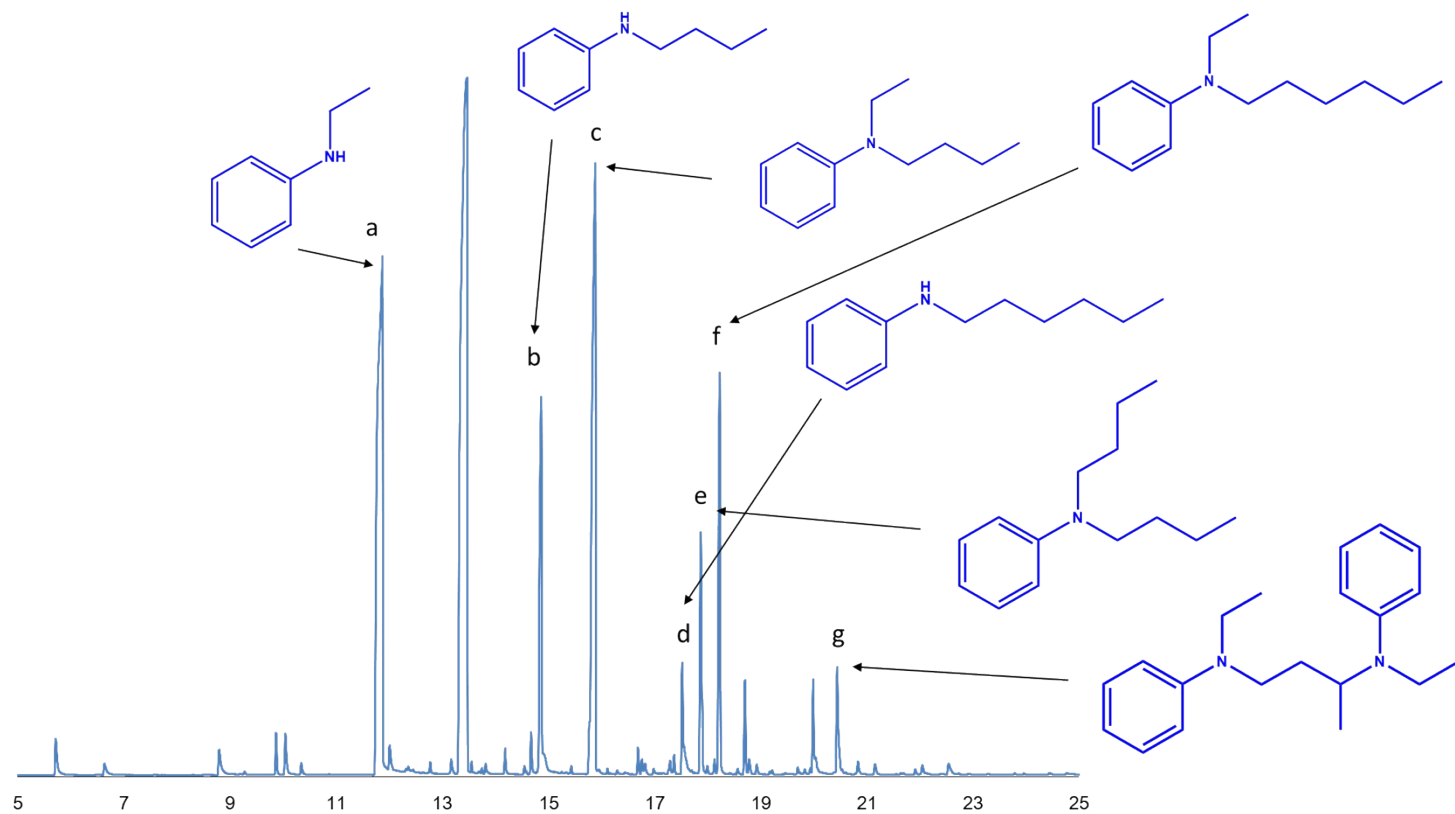

**Figure S14.** GC-MS analysis after 5h during *N,N*-diethylaniline transformation (2 g *N,N*-diethylaniline,  $p(N_2)=5$  bar, 0.1 g Pd/Al<sub>2</sub>O<sub>3</sub>, 200 °C ) with assignment of the products a,b,c,d,e,f,g in the Figure S15

a

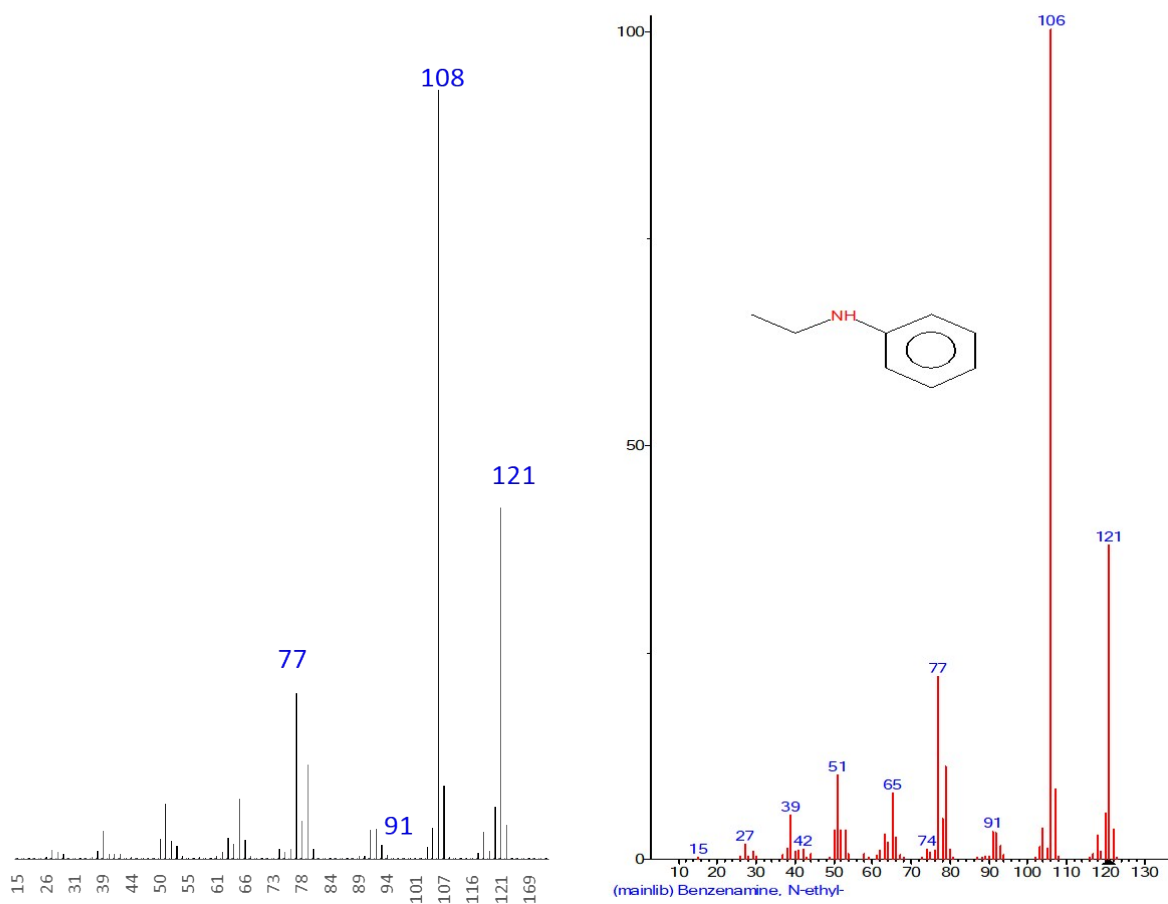

**Figure S15-a.** MS spectrum of the product a from Figure S14 in comparison with assignment in NIST library to N-ethylaniline

**b**

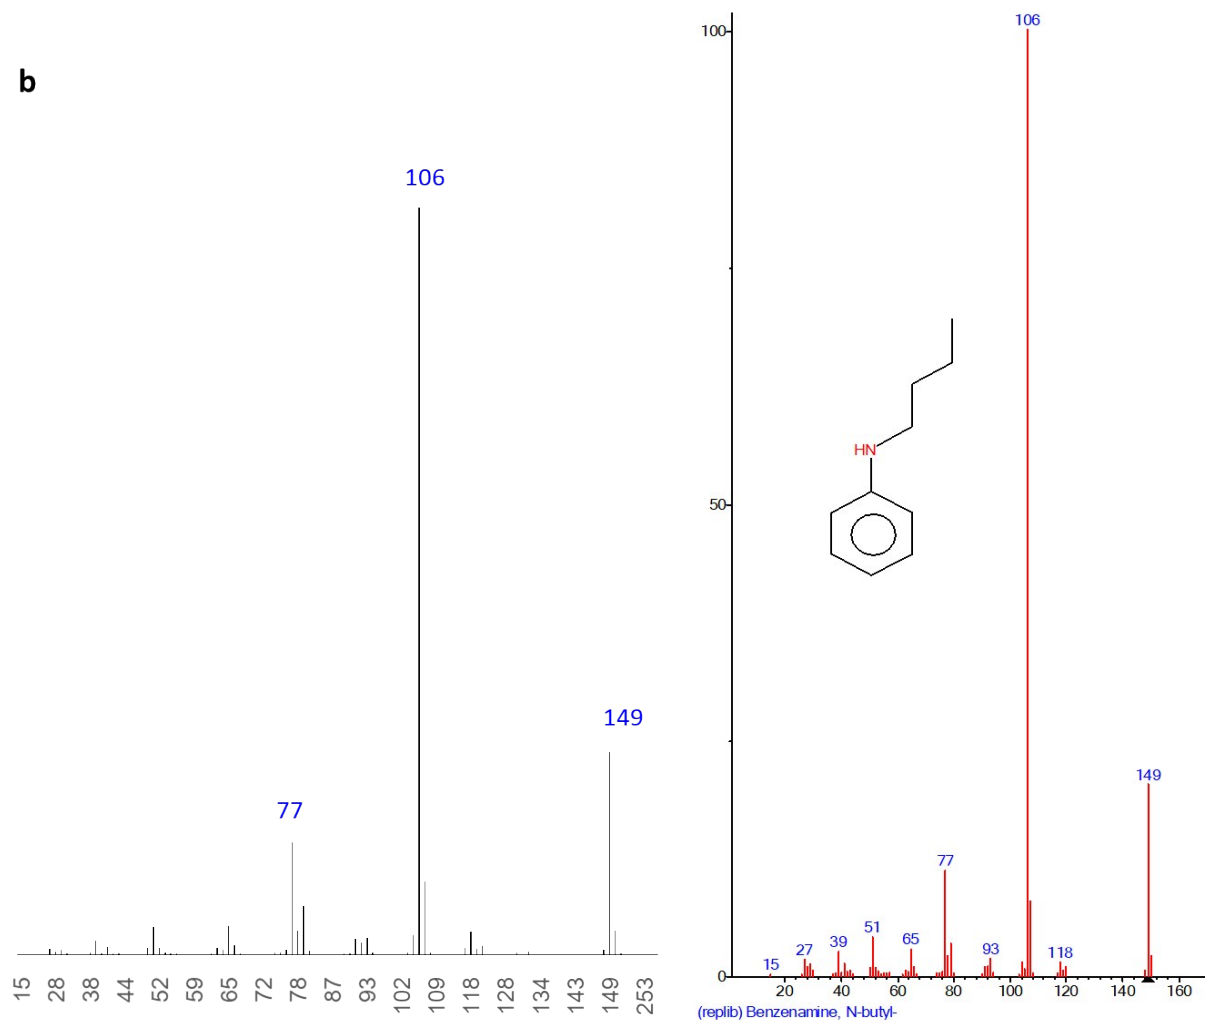

**Figure S15-b.** MS spectrum of the product **b** from Figure S14 in comparison with assignment in NIST library to N-butylaniline

c

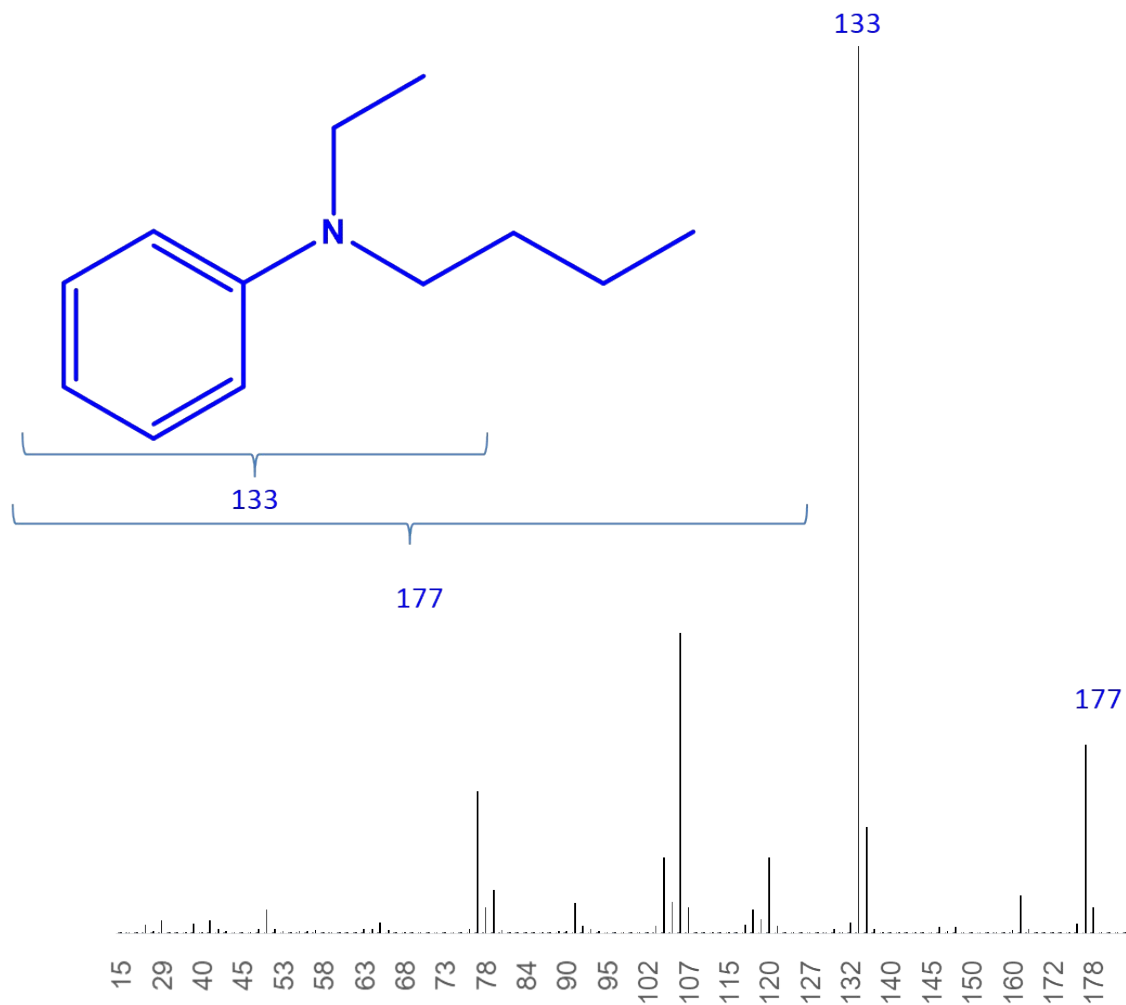

**Figure S15-c.** MS spectrum of the product c from Figure S14 in comparison with assignment in NIST library to N-ethylbutylaniline

d

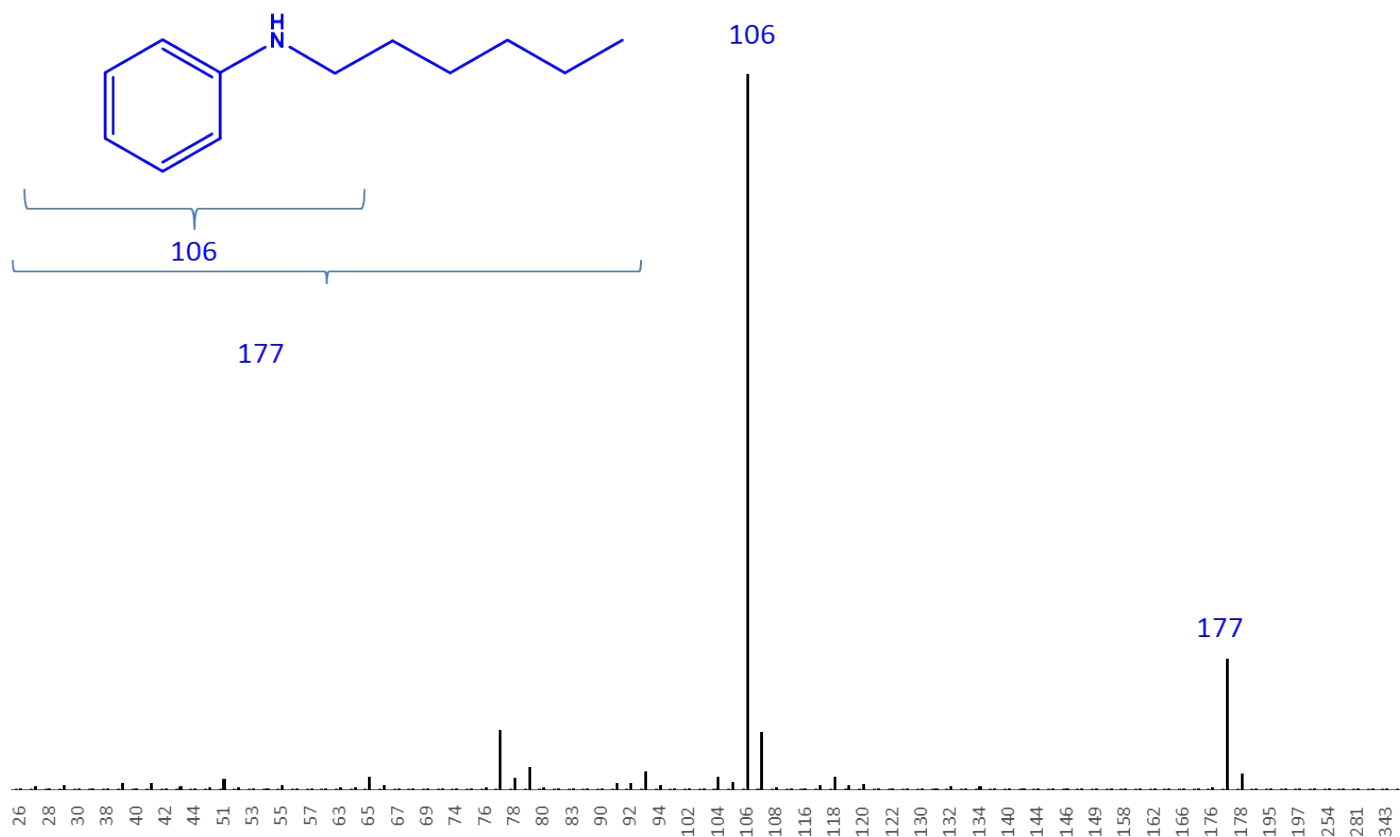

**Figure S15-d.** MS spectrum of the product *c* from Figure S14 in comparison with assignment in NIST library to *N*-hexylaniline



e

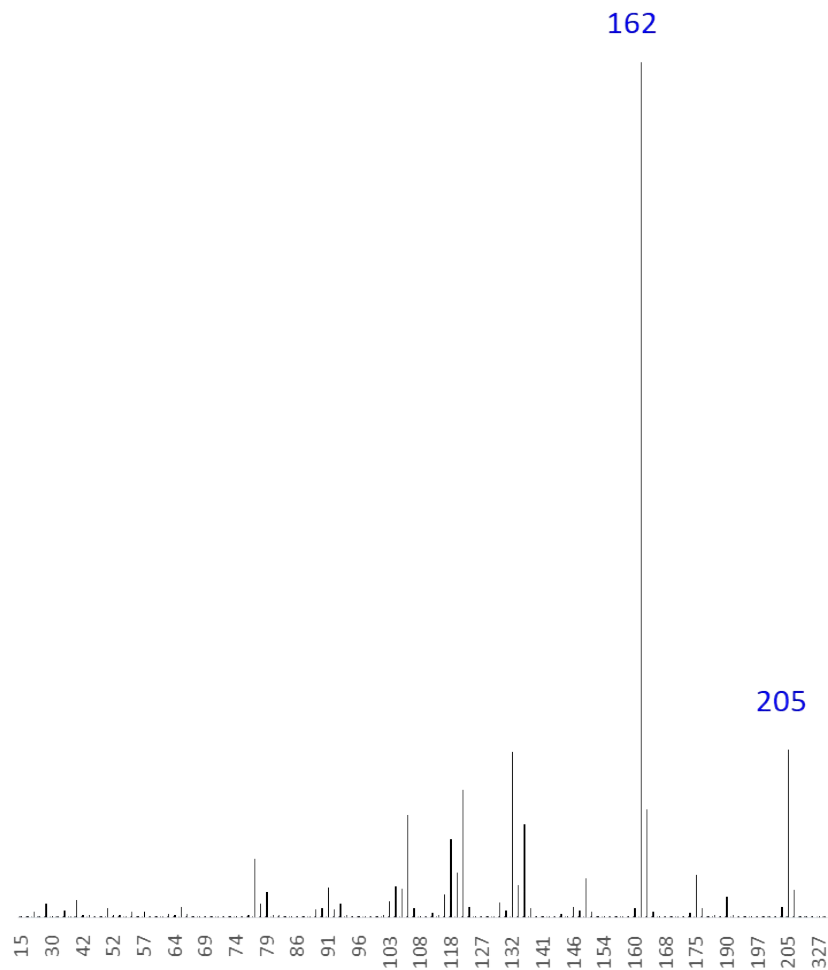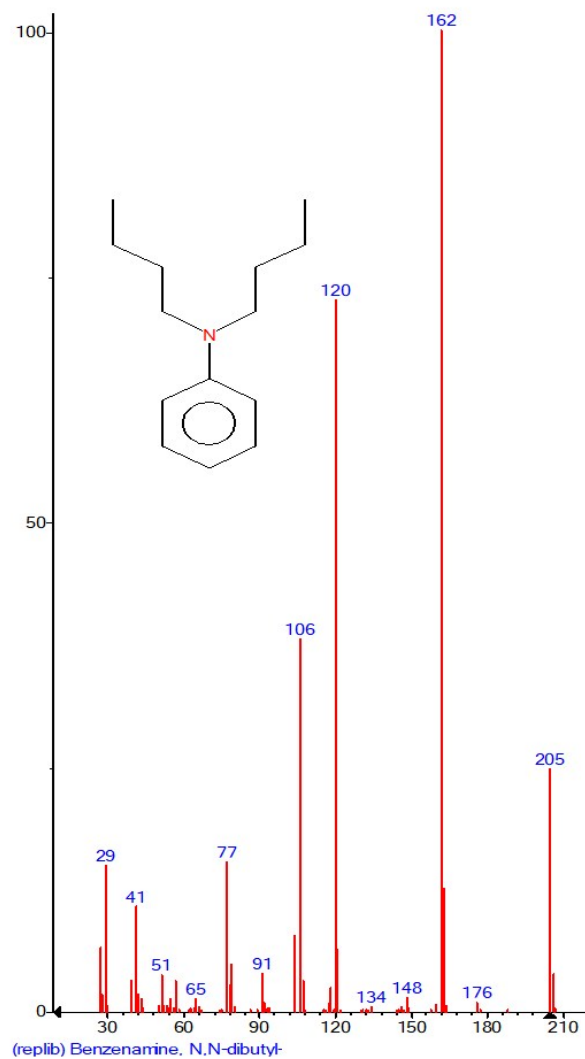

**Figure S15-e.** MS spectrum of the product c from Figure S14 in comparison with assignment in NIST library to N,N-dibutylaniline

f

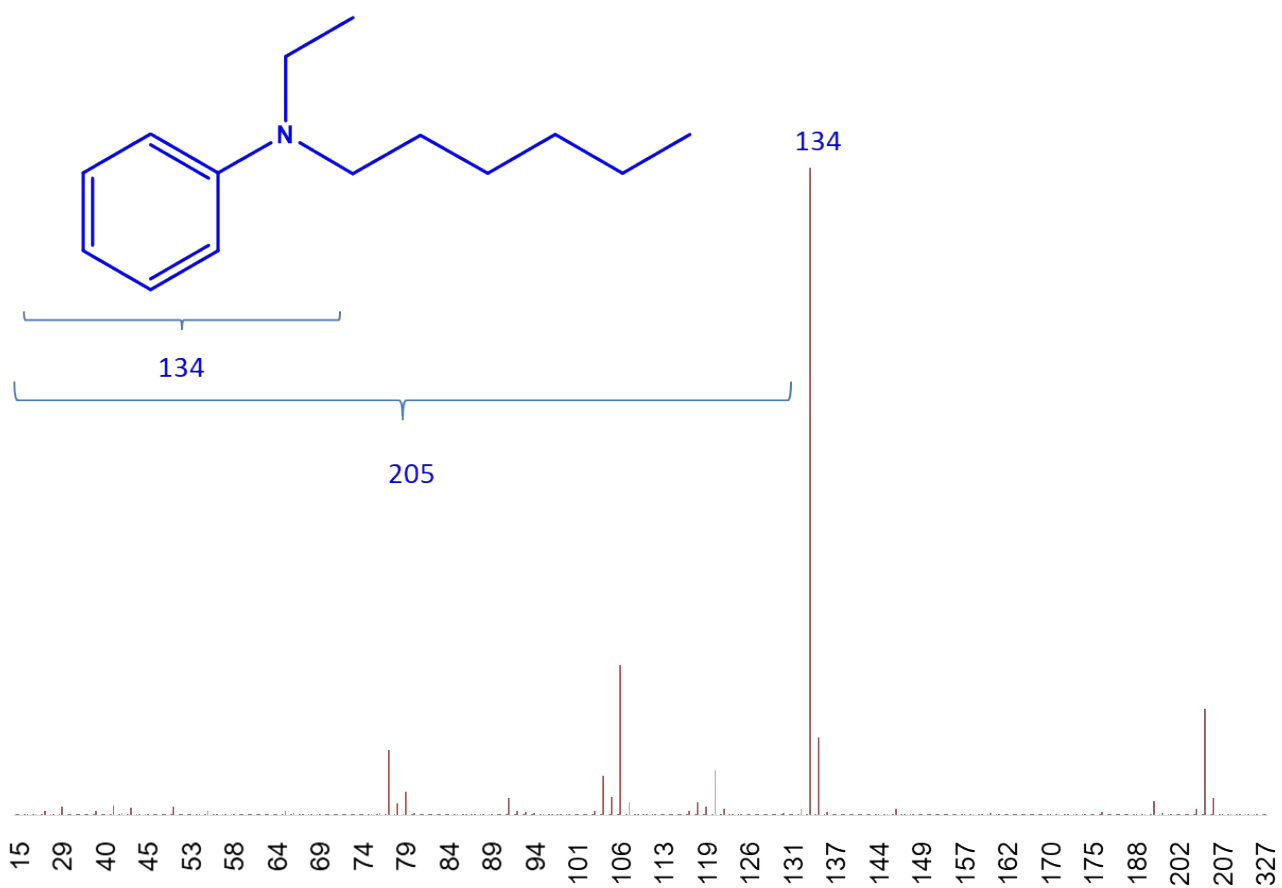

**Figure S15-f.** MS spectrum of the product f from Figure S14 indicating on formation of N,N-ethylhexylaniline

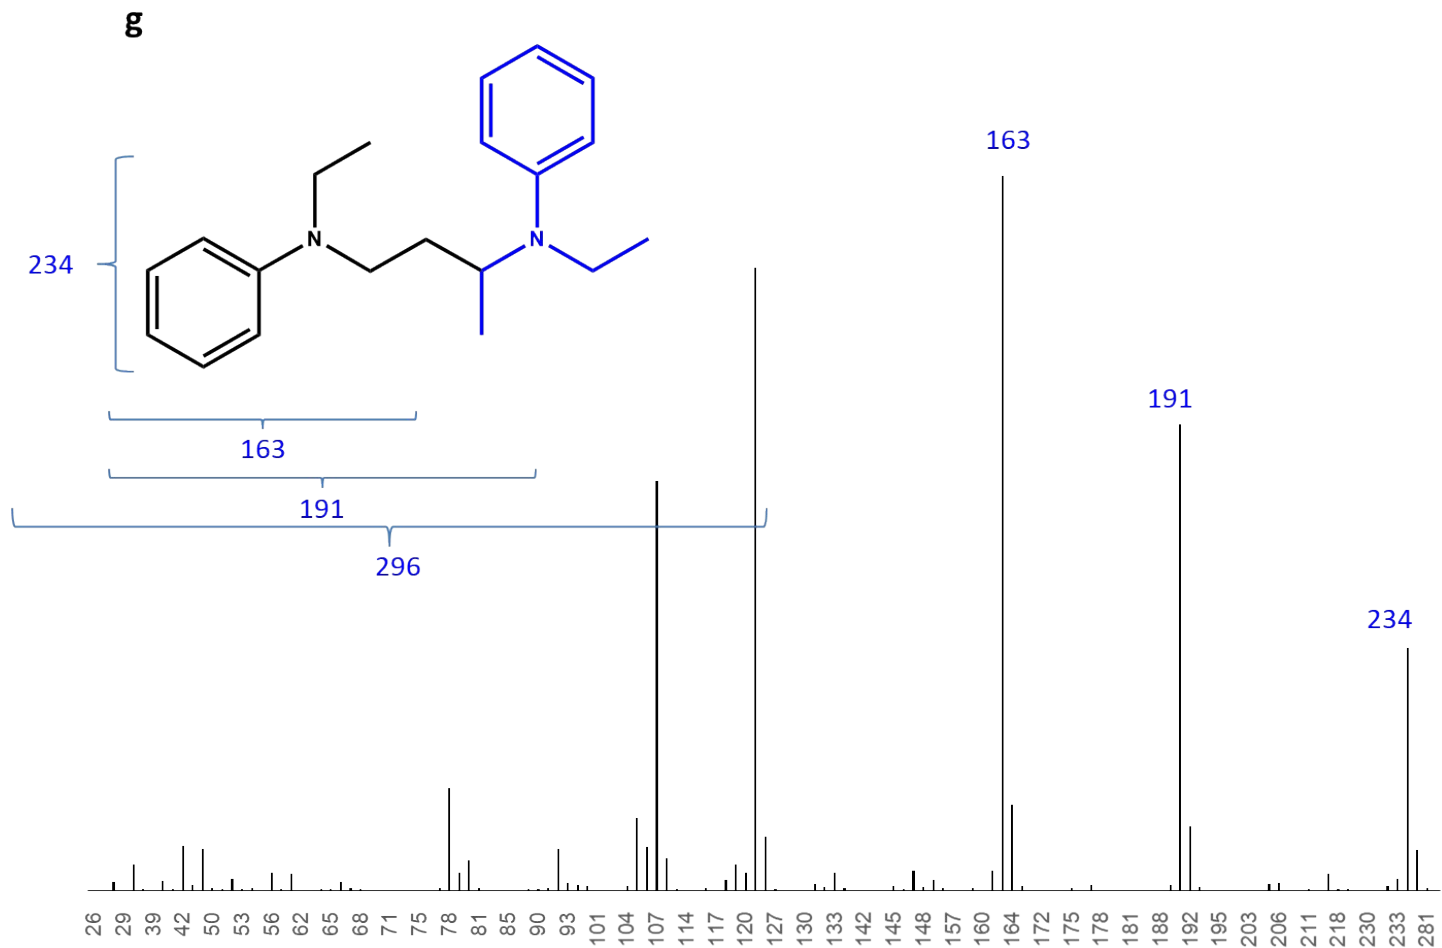

**Figure S15-g.** MS spectrum of the product g from Figure S14 indicating on formation of *N,N*-diethyl-*N,N*-diphenylbutane-1,3-diamine
